1                   **Protein Deacetylase CobB Interplays with c-di-GMP**

2

3   Zhaowei Xu<sup>1+</sup>, Hainan Zhang<sup>1+</sup>, Xingrun Zhang<sup>4,5+</sup>, Chengxi Liu<sup>1</sup>, Hwei Jiang<sup>1</sup>, Fanlin

4   Wu<sup>1</sup>, Lili Qian<sup>6</sup>, Daniel M. Czajkowsky<sup>3</sup>, Shujuan Guo<sup>1</sup>, Lijun Bi<sup>7,8</sup>, Shihua Wang<sup>9</sup>,

5   Haitao Li<sup>4,5</sup>, Minjia Tan<sup>6</sup>, Lei Feng<sup>10</sup>, Jingli Hou<sup>10</sup>, Sheng-ce Tao<sup>1,2,3\*</sup>

6

7   <sup>1</sup>Key Laboratory of Systems Biomedicine (Ministry of Education), Shanghai Center for

8   Systems Biomedicine, Shanghai Jiao Tong University, 800 Dongchuan Road, Shanghai

9   200240, China

10   <sup>2</sup>State Key Laboratory of Oncogenes and Related Genes, Shanghai 200240, China

11   <sup>3</sup>School of Biomedical Engineering, Shanghai Jiao Tong University, Shanghai 200240,

12   China

13   <sup>4</sup>MOE Key Laboratory of Protein Sciences, Center for Structural Biology, School of

14   Life Sciences, Tsinghua University, Beijing 100084, China

15   <sup>5</sup>Department of Basic Medical Sciences, School of Medicine, Tsinghua University,

16   Beijing 100084, China

17   <sup>6</sup>The Chemical Proteomics Center and State Key Laboratory of Drug Research,

18   Shanghai Institute of Materia Medica, Chinese Academy of Sciences, Shanghai

19   201203, China

20   <sup>7</sup>National Key Laboratory of Biomacromolecules, Key Laboratory of Non-Coding RNA

21   and Key Laboratory of Protein and Peptide Pharmaceuticals, Institute of Biophysics,

22   Chinese Academy of Sciences, Beijing 100101, China

23 <sup>8</sup>School of Stomatology and Medicine, Foshan University, Foshan 528000,

24 Guangdong Province, China

25 <sup>9</sup>School of Life Science, Fujian Agriculture and Forestry University, Fuzhou, Fujian

26 350002, China

27 <sup>10</sup>Instrumental Analysis Center, Shanghai Jiao Tong University, 800 Dongchuan Road,

28 Shanghai 200240, China

29 \* Correspondence address. Email: [taosc@sjtu.edu.cn](mailto:taosc@sjtu.edu.cn) (S.C.-Tao)

30 †These authors contributed equally to this work

31

32

33

34

35

36

37

38

39

40

41

42

43

44

45 **Abstract**

46 As a ubiquitous bacterial secondary messenger, c-di-GMP plays key  
47 regulatory roles in processes such as bacterial motility and transcription  
48 regulation. CobB is the Sir2 family protein deacetylase that controls  
49 energy metabolism, chemotaxis and DNA supercoiling in many bacteria.  
50 Using an *E.coli* proteome microarray, we found that c-di-GMP strongly  
51 binds to CobB. Protein deacetylation assays showed that c-di-GMP  
52 inhibits CobB activity and thereby modulates the biogenesis of  
53 acetyl-CoA. Through mutagenesis studies, residues R8, R17 and E21 of  
54 CobB were shown to be required for c-di-GMP binding. Next, we found  
55 that CobB is an effective deacetylase of YdeH, a major diguanylate  
56 cyclase (DGC) of *E.coli* that is endogenously acetylated. Mass  
57 spectrometry analysis identified YdeH K4 as the major site of acetylation,  
58 and it could be deacetylated by CobB. Interestingly, deacetylation of  
59 YdeH enhances its stability and cyclase activity in c-di-GMP production.  
60 Thus, our work establishes a novel negative feedback loop linking  
61 c-di-GMP biogenesis and CobB-mediated protein deacetylation.

62

63 **Key words**

64 c-di-GMP; CobB; diguanylate cyclase; protein acetylation; negative  
65 feedback loop

66

## 67 Introduction

68 Cyclic diguanosine monophosphate (c-di-GMP) was first identified in  
69 *Gluconacetobacter xylinus*, where it was found to regulate cellulose  
70 synthesis<sup>1</sup>. Subsequently, c-di-GMP was shown to be involved in a wide  
71 range of bacterial biological processes such as bacterial motility, biofilm  
72 formation, virulence and transcription regulation<sup>2-4</sup>. However, these  
73 processes likely represent only a portion of the full scope of its diverse  
74 functions in the cell, owing to the typical challenges of unambiguously  
75 ascribing functionality directly to the activity of a specific small molecule  
76 second messenger<sup>5</sup>. A first step toward this understanding has often  
77 emerged from an identification of the proteins to which it strongly  
78 interacts, as exemplified in studies of c-di-GMP binding to YcgR<sup>6</sup>, CckA<sup>7</sup>,  
79 BldD<sup>8</sup> and CheY-like (Cle) proteins<sup>9</sup>. Thus, we speculated that a better  
80 understanding of the full repertoire of c-di-GMP functions in bacteria  
81 would emerge from a comprehensive knowledge of the complete range  
82 of proteins to which it binds.

83 c-di-GMP is synthesized by diguanylate cyclases (DGCs)<sup>10</sup> and  
84 degraded by specific phosphodiesterases (PDEs)<sup>11-13</sup>. In *E.coli*, the  
85 dominant DGCs are YdeH (also known as DgcZ)<sup>14</sup> and DosC<sup>15</sup>, and the  
86 major PDEs are YhjH<sup>16</sup> and DosP<sup>15</sup>. Each of these proteins has been  
87 shown to be modulated by “first” messengers such as light, oxygen and  
88 temperature<sup>2</sup>. Yet, owing to the involvement of c-di-GMP in the

89    aforementioned fundamental biological processes that are all  
90    well-regulated by many basic metabolic mechanisms<sup>17, 18</sup>, there is also  
91    the possibility that c-di-GMP biosynthesis is also regulated via  
92    metabolism-related intracellular signals.

93        The Sir2 family protein CobB is a NAD<sup>+</sup>-dependent deacetylase that is  
94    highly conserved in prokaryotes<sup>19, 20</sup>. In *E.coli*, CobB is the sole Sir2  
95    homolog, although there are two forms of CobB, namely, CobB and  
96    CobB<sub>s</sub>, the former of which has an additional 37 aa N-terminal tail<sup>21</sup>.  
97    CobB exhibits protein deacetylation activity and it regulates a variety of  
98    physiological functions. For example, CobB deacetylates lysine-609 of  
99    acetyl-coenzyme A synthetase (Acs) to activate its activity<sup>22</sup>, resulting in  
100   an increased cellular concentration of acetyl-coenzyme A (acetyl-CoA),  
101   which is a central component of energy metabolism. In addition, CobB  
102   regulates *E.coli* chemotaxis by deacetylating the chemotaxis response  
103   regulator protein (CheY)<sup>23</sup>, as well as the activity of N-hydroxyarylamine  
104   O-acetyltransferase (NhoA)<sup>24</sup> and topoisomerase I (TopA)<sup>25</sup>. Yet, despite  
105   the critical role that CobB plays in many biological processes, its inherent  
106   regulation remains poorly understood<sup>26-28</sup>.

107        To globally identify c-di-GMP effectors and explore new functions of  
108   c-di-GMP, we employed an *E.coli* proteome microarray<sup>29</sup> for  
109   proteome-wide identification of c-di-GMP binding proteins. Surprisingly,  
110   we found that c-di-GMP strongly binds to CobB. Subsequent biochemical

111 analysis confirmed that c-di-GMP binds to CobB and inhibits its  
112 deacetylation activity both *in vitro* and *in vivo*. Furthermore, we found  
113 that the major DGC in *E.coli*, YdeH, is endogenously acetylated and CobB  
114 promotes the stability and activity of YdeH through deacetylation of  
115 lysine-4. Altogether, we have established an evidence-based regulation  
116 loop underlying the cytoplasmic concentration of c-di-GMP that involves  
117 its direct binding to, and thereby inhibition of CobB.

118

## 119 **Results**

### 120 **Protein deacetylase CobB is a novel c-di-GMP effector**

121 To identify novel effectors of c-di-GMP, an *E.coli* proteomic microarray  
122 was probed with biotin-c-di-GMP. In this way, CobB (specifically, the  
123 version of CobB with the extra N-terminal tail) was identified as a strong  
124 binder of c-di-GMP (**Fig. 1a**). To validate this interaction, we developed a  
125 simple *in vitro* assay in where purified CobB was incubated with  
126 biotin-c-di-GMP, UV crosslinked, and then probed with fluorescent  
127 streptavidin.<sup>30,31</sup> We found that c-di-GMP indeed exhibits strong binding  
128 to CobB, although trace bindings were also observed for cGMP and  
129 c-di-AMP (**Fig. 1b**). Mixing c-di-GMP with biotin-c-di-GMP before the two  
130 were added to CobB resulted in a significant reduction in  
131 biotin-c-di-GMP binding to CobB (**Fig. 1b**). To quantify the binding  
132 strength of this interaction, we performed Isothermal Titration

133 Calorimetry (ITC) and found that the c-di-GMP/CobB affinity constant,  $K_d$ ,  
134 is 21.6  $\mu\text{M}$  with a binding stoichiometry of 0.97. We also performed ITC  
135 assays with cGMP and c-di-AMP, and no binding was detected with  
136 these two molecules (**Fig. 1c and supplementary Fig. 1a-c**). To confirm  
137 these results, we also determined the affinity constant using Microscale  
138 Thermophoresis (MST), which yielded a  $K_d$  of  $22.7 \pm 1.63 \mu\text{M}$  for the  
139 interaction between c-di-GMP and CobB (**Supplementary Fig. 2**). We  
140 note however that while the affinity constants determined from ITC and  
141 MST are consistent with each other, we observed some polymerization  
142 of CobB in the presence of c-di-GMP (**Supplementary Fig. 3**), which may  
143 somewhat affect the measurement of the affinity for c-di-GMP.  
144 Nonetheless, taken together, these results clearly show that c-di-GMP  
145 specifically binds to CobB.

146

### 147 **c-di-GMP inhibits the deacetylase activity of CobB and down-regulates** 148 **the biogenesis of acetyl-CoA**

149 With the demonstration of binding between c-di-GMP and CobB, we  
150 speculated that c-di-GMP may affect the deacetylase activity of CobB. To  
151 test this, we examined the activity of CobB in the presence of c-di-GMP  
152 by monitoring the deacetylation of the well-known CobB substrates,  
153 Acs<sup>22</sup>, CheY<sup>23</sup>, and NhoA<sup>24</sup>. Before incubation with CobB, we found that  
154 purified Acs from a CobB-deficient *E.coli* ( $\Delta\text{cobB}$ ) is highly acetylated (**Fig.**

155 **2a**). Incubation with CobB resulted in significant reduction in acetylation,  
156 consistent with previous work<sup>22</sup> (**Fig. 2a**). However, in the presence of  
157 c-di-GMP, the deacetylation of Acs was significantly inhibited in a dose  
158 dependent manner (**Fig. 2a and supplementary Figure 4a**). By contrast,  
159 neither the presence of cGMP nor c-di-AMP affected the CobB  
160 deacetylation of Acs. Similar results were obtained for CheY  
161 (**Supplementary Figure 4b**) and NhoA (**Supplementary Figure 4c**).

162 To examine the inhibition of c-di-GMP on CobB in more detail, we  
163 measured the kinetics of CobB deacetylation of an acetylated peptide<sup>32</sup>  
164 at different concentrations of c-di-GMP. We found that c-di-GMP  
165 significantly reduces the maximal catalytic rate of CobB, with no changes  
166 to the Km values, yielding a  $K_i$  of c-di-GMP for CobB of 32.27  $\mu\text{M}$  (**Fig. 2b**).  
167 Thus, c-di-GMP noncompetitively inhibits the deacetylation activity of  
168 CobB, suggesting that the binding region of c-di-GMP on CobB is not in  
169 the catalytic pocket.

170 To further confirm the inhibition of c-di-GMP on CobB activity, we  
171 sought to alter the endogenous levels of c-di-GMP and test the  
172 deacetylation activity of CobB *in vivo*. In *E.coli*, YdeH<sup>14</sup> is the major DGC  
173 that produces c-di-GMP. Thus, we examined an *E.coli* strain with  
174 overexpressed YdeH (*ydeH*<sup>+</sup>) and a strain expressing a dysfunctional  
175 mutant YdeH (*ydeH*<sup>G206A,G207A</sup>)<sup>14</sup> to produce strains with high and low  
176 levels of c-di-GMP, respectively. To monitor the activity of CobB, we



177 examined the acetylation level of endogenous Acs to which a  
178 chromosomal C-terminal FLAG-tag was attached. We also examined a  
179 series of CobB-depleted strains, namely  $\Delta cobB$ ,  $\Delta cobB::cobB$  and  
180  $\Delta cobB::cobB ydeH^+$ , to further investigate this interaction. As expected,  
181 high levels of c-di-GMP were clearly observed for strains with YdeH<sup>+</sup>  
182 **(Fig.2c)**. In these strains, we found a significant reduction of  
183 deacetylation of Acs **(Fig.2d)**. We found that this deacetylation of Acs is  
184 abolished by the deletion of CobB ( $\Delta cobB$ ), and that this could be  
185 recovered by putting back CobB ( $\Delta cobB::cobB$ ). Thus, these results  
186 indicate that c-di-GMP increases the acetylation levels of Acs in a  
187 CobB-dependent manner.

188 It is known that CobB activates Acs through deacetylation of K609,  
189 and Acs is responsible for the synthesis of acetyl-CoA, which is essential  
190 for cell growth<sup>22</sup>. It is also known that both acetate and propionate can  
191 serve as a donor for acetyl-CoA for cell growth<sup>33, 34</sup> **(Fig.2e)**. To further  
192 confirm the regulatory role of c-di-GMP on acetyl-CoA synthesis, all of  
193 the aforementioned strains **(Fig.2f)** were cultured using acetate or  
194 propionate as the sole carbon source. For the CobB deficient cells  
195 ( $\Delta cobB$ ), we observed an obvious growth defect, consistent with a lack of  
196 activated Acs. Similarly, overexpression of YdeH significantly inhibited  
197 cell growth in the  $ydeH^+$  and  $\Delta cobB::cobB ydeH^+$  strains. These results are  
198 consistent with an inhibition of CobB by high levels of c-di-GMP **(Fig.2f,**

199 **Supplementary Table 1).** We also found that the *ydeH*<sup>G206A,G207A</sup> strain  
200 exhibited a similar growth as that of the WT strain. The inhibition of  
201 growth in the strains with *ydeH*<sup>+</sup> was similar at concentrations of acetate  
202 or propionate of 10 mM or 30 mM (**Supplementary Fig. 5,**  
203 **Supplementary Table 1).** Thus, in addition to confirming the c-di-GMP  
204 inhibition of CobB *in vivo*, these results strongly suggest that c-di-GMP is  
205 a physiologically relevant effector of the regulation of acetyl-CoA  
206 biogenesis through the inhibition of the deacetylation activity of CobB.

207

#### 208 **c-di-GMP globally affects CobB-dependent deacetylation in vivo**

209 To determine whether c-di-GMP could affect CobB-dependent  
210 deacetylation in a global setting, we applied Stable Isotope Labeling with  
211 Amino acids in Cell culture (SILAC) coupled with MS to quantitatively  
212 compare the levels of protein acetylation in WT and *ydeH*<sup>+</sup> cells.  
213 Previously, Weinert *et al.*<sup>34</sup> identified 366 CobB regulated acetylation  
214 sites when *E.coli* was cultured in M9 media supplemented with 0.2%  
215 glucose. In addition, Cerezo *et al.*<sup>35</sup> identified 283 acetylation sites in  
216 *E.coli* under carbon-limited conditions. Since the acetylome of *E.coli*  
217 varies significantly under different culture conditions, to facilitate  
218 comparisons with previous work, we adopted the procedure developed  
219 by Weinert *et al.*<sup>34</sup> with slight modifications (see Methods). A total of 802  
220 acetylation sites (**Data set S1**) were identified, of which 107 (**Data set S2**)

221 exhibited enhanced acetylation upon overexpression of YdeH (**Fig. 3a, b,**  
222 **supplementary Fig. 6**). Of the CobB regulated acetylation sites identified  
223 by Weinert *et al.*<sup>34</sup> (**Data set S3**), 43 were discovered in our study, 28 of  
224 which were among those that exhibited greater acetylation in *ydeH*<sup>+</sup> (**Fig.**  
225 **3c, data Set S4**). Hence, CobB regulated sites are enriched in *ydeH*<sup>+</sup> cells.  
226 Furthermore, we mapped the 107 c-di-GMP upregulated sites to 87  
227 proteins and found that 42 of these proteins overlap with the 271 CobB  
228 regulated proteins identified previously<sup>34</sup> (**Fig. 3d, data Set S5**). We also  
229 compared the functional categories of the c-di-GMP upregulated  
230 proteins with the CobB regulated proteins and found that these two sets  
231 of proteins are highly similar in several classifications (**Supplementary**  
232 **Fig. 7**). We note that slight differences in our procedure from that  
233 described by Weinert *et al.* (particularly the absence of fractionation  
234 before MS analysis) may explain the lower numbers of acetylation sites  
235 identified here compared to the earlier work (802 vs. 3,680).  
236 Nevertheless, our data strongly indicate that c-di-GMP regulated  
237 acetylation is closely related to CobB dependent deacetylation. Thus,  
238 these results suggest that c-di-GMP globally affects CobB-dependent  
239 protein deacetylation *in vivo*.

240

#### 241 **Mutagenesis and binding studies of the CobB and c-di-GMP interaction**

242 There is an additional 37 aa N-terminal tail in CobB compared to that of

243 CobB<sub>S</sub><sup>21</sup> (**Fig. 4a**). Streptavidin blotting assays showed that truncation of  
244 the N-terminal fragment of CobB disrupts c-di-GMP binding, suggesting  
245 that residues 1-37 of CobB are essential for c-di-GMP interaction (**Fig.**  
246 **4b**). It is known that c-di-GMP binds to many of its effectors by Arg, Leu,  
247 Asp and Glu residues<sup>36</sup>. To determine the exact binding sites on CobB,  
248 we mutated all Arg, Leu, Asp and Glu residues to Ala within the CobB  
249 N-terminal domain. We found that only CobB mutants with R8A, R17A  
250 and E21A exhibited a weakened interaction with c-di-GMP (**Fig. 4c**). We  
251 next performed ITC titration with these mutants and found that the  $K_d$   
252 values are 1.8 mM, 1.6 mM and 0.32 mM for CobB<sup>R8A</sup>, CobB<sup>R17A</sup> and  
253 CobB<sup>E21A</sup>, respectively (**Fig. 4d**), which is 15 to 83-fold lower than that of  
254 the wild type CobB (**Fig. 1c and supplementary Fig. 1d-f**). Despite a loss  
255 of c-di-GMP binding, CobB<sup>R8A</sup>, CobB<sup>R17A</sup> and CobB<sup>E21A</sup> displayed similar  
256 deacetylase activity as CobB. Importantly, addition of c-di-GMP did not  
257 inhibit the activity of these mutants (**Fig. 4e**). Collectively, these data  
258 suggest that R8, R17 and E21 are important for c-di-GMP binding but do  
259 not directly participate in the catalytic activity of CobB.

260 To further validate the specific binding of c-di-GMP to CobB, we  
261 constructed strains of these three CobB mutants, *i.e.*,  $\Delta cobB::cobB^{R8A}$   
262  $ydeH^+$ ,  $\Delta cobB::cobB^{R17A}$   $ydeH^+$  and  $\Delta cobB::cobB^{E21A}$   $ydeH^+$  based on an  
263 *E.coli* strain that includes the chromosomal Flag-tagged Acs. These  
264 strains were cultured with acetate or propionate and the c-di-GMP

265 concentrations were measured (**Supplementary Fig. 8a**). To monitor the  
266 *in vivo* activity of CobB, we examined the acetylation of endogenous Acs.  
267 As expected, the acetylation levels of Acs were significantly lower in the  
268 strains with these CobB mutants, compared with that in the  $\Delta cobB::cobB$   
269  $ydeH^+$  strain (**Fig. 4f**). Additionally, these CobB mutant strains showed  
270 similar growth rates as  $\Delta cobB::cobB$ , but higher growth rates than  
271  $\Delta cobB::cobB ydeH^+$  (**Fig. 4g, supplementary Fig. 8b-d**). Hence, these  
272 results provide *in vivo* evidence for the role of these residues in CobB in  
273 the binding of c-di-GMP.

274

### 275 **The binding and inhibition of the deacetylation activity of CobB by** 276 **c-di-GMP is conserved among prokaryotes**

277 CobB is a Sir2 homolog that is highly conserved in prokaryotes. We thus  
278 hypothesized that the binding and inhibition of c-di-GMP observed with  
279 CobB from *E.coli* is the same for the CobB homologues in other  
280 prokaryotes. To test this hypothesis, CobB protein sequences from a  
281 series of highly diverse bacteria were aligned (**Supplementary Fig. 9**).  
282 We found that the c-di-GMP binding region is reasonably well conserved  
283 in these bacteria (**Fig. 5a**). Examining *S. typhimurium* CobB as an  
284 exemplary member of this conserved set, we found that CobB<sup>*S. typhimurium*</sup>  
285 binds to c-di-GMP, but not to c-di-AMP and cGMP (**Fig. 5b**). Furthermore,  
286 we determined the affinity of *S. typhimurium* CobB and c-di-GMP to be

287 15.5  $\mu$ M (**Supplementary Fig. 10**), and that the CobB<sup>*S. typhimurium*</sup>  
288 deacetylation of Acs could be clearly inhibited by c-di-GMP, but not  
289 cGMP and c-di-AMP (**Fig. 5c**).

290

### 291 **CobB deacetylates YdeH on K4 to activate its DGC activity**

292 Protein acetylation is one of the most abundant post-translational  
293 modifications in bacteria (and eukaryotes), with hundreds of acetylated  
294 proteins already identified in *E.coli*<sup>37, 38</sup>. We speculated that some of the  
295 proteins involved in c-di-GMP metabolism are endogenously acetylated  
296 and could be deacetylated by CobB. We selected 4 DGCs (YdeH, YaiC,  
297 YegE and YeaJ), 2 PEDs (YahA, DosP), and 3 GTPases (Era, YihK and YihI)  
298 from *E.coli* to test this possibility. We found that the 2 DGCs (YdeH, YegE)  
299 and 2 GTPases (Era, YihK) were acetylated (**Fig. 6a**). Further, treating  
300 these proteins with CobB, we found that YdeH (DGC) and Era (GTPase)  
301 could be effectively deacetylated by CobB (**Fig. 6a**). To determine the  
302 residue(s) of YdeH targeted for deacetylation by CobB, both acetylated  
303 YdeH and CobB-treated deacetylated YdeH were subjected to  
304 mass-spectrometry analysis. In this way, YdeH K4, K170, K277 were  
305 determined as the sites that could be deacetylated by CobB (**Fig. 6b**,  
306 **supplementary Fig. 11**). To validate these sites, we mutated all 8 Lys  
307 residues of YdeH to Ala individually, and found that only the YdeH K4  
308 mutant exhibited a significantly decreased acetylation level (**Fig. 6c**).

309 These results indicate that K4 is the dominant acetylated site on YdeH. In  
310 addition, two other acetylation sites were also identified on Era (K171)  
311 **(Supplementary Fig. 12a)** and YegE (K936) **(Supplementary Fig. 12b)**.

312 To verify the functional role of YdeH K4 acetylation, we mutated the  
313 Lys to Arg (YdeH<sup>K4R</sup>), Gln (YdeH<sup>K4Q</sup>) or Ala (YdeH<sup>K4A</sup>). Western blotting  
314 showed that these mutations significantly reduced the level of  
315 acetylation of YdeH compared to that of WT YdeH **(Fig. 6d)**. Since YdeH  
316 is the major DGC in *E.coli*, we then set to test whether CobB  
317 deacetylation could affect the DGC activity of YdeH using UPLC-IM MS  
318 **(Fig. 6e)**. Upon CobB treatment, WT YdeH showed a 2-fold increased  
319 production of c-di-GMP, while the activities of YdeH<sup>K4R</sup>, YdeH<sup>K4Q</sup> and  
320 YdeH<sup>K4A</sup> were 69.5%, 29.5%, and 27.1% of that of the WT, respectively  
321 **(Fig. 6f)**. Unexpectedly, the mutant YdeH<sup>K4R</sup> that structurally resembles  
322 the deacetylation form of YdeH also exhibited a lower DGC activity.  
323 Evidently, the “K” to “R” mutation at residue 4 fails to fully mimic the  
324 deacetylation status of this site. Nonetheless, these results suggest that  
325 K4 is critical for the DGC activity of YdeH.

326 To test whether CobB can regulate the c-di-GMP levels *in vivo*, we  
327 constructed several *ydeH*<sup>+</sup> and  $\Delta$ *cobB ydeH*<sup>+</sup> strains, including those with  
328 CobB mutants or with YdeH mutants, and then determined the YdeH  
329 acetylation and c-di-GMP levels. We found that the acetylation level of  
330 YdeH in *ydeH*<sup>+</sup> is lower than that of  $\Delta$ *cobB ydeH*<sup>+</sup> and the c-di-GMP level

331 of *ydeH*<sup>+</sup> is significantly higher than that of  $\Delta cobB$  *ydeH*<sup>+</sup> (**Fig. 6g**). These  
332 results confirm that CobB can regulate the DGC activity of YdeH through  
333 deacetylation. The strains with the YdeH mutants exhibited the lowest  
334 DGC activity, confirming that K4 is critical to the DGC activity of YdeH (**Fig.**  
335 **6g**). Interestingly, the strains with the CobB mutants exhibit lower  
336 acetylation levels than WT CobB (**Fig. 6g**). These results indicate that  
337 c-di-GMP does not affect the activity of the CobB R8A, R17A and E21A  
338 mutants *in vivo*. Still, the CobB mutants exhibited higher c-di-GMP levels,  
339 further confirming that CobB promotes the DGC activity of YdeH through  
340 deacetylation.

341

#### 342 **CobB enhances the solubility/stability of YdeH through deacetylation**

343 We found that the acetylation level of endogenous YdeH is significantly  
344 decreased in WT cells compared to that of CobB-deficient cells (**Fig. 7a**).  
345 In order to better characterize the endogenous stoichiometry of YdeH K4  
346 acetylation, we used the absolute quantification (AQUA) method<sup>39, 40</sup> to  
347 quantify the level of the K4 acetylated peptide. As shown in **Fig. 7b**, the  
348 YdeH K4 acetylation stoichiometry was  $1.3 \pm 0.2$  % for the CobB deficient  
349 cells, while it is undetectable for the WT cells.

350 Since it is known that acetylation can lead to protein degradation *in*  
351 *vivo*<sup>41</sup>, we speculated that acetylation of YdeH may affect its stability.  
352 Indeed, we found that the level of endogenous soluble YdeH decreased



353 40% in CobB deficient cells as compared to that of the WT cells (and also  
354 the CobB recovered cells) in exponential growth (**Fig. 7c**), and more  
355 significantly, a decrease of 70% soluble YdeH was observed for stationary  
356 growth (**Supplementary Fig. 16c**). Furthermore, for stationary growth, a  
357 significant amount of precipitated YdeH was observed for CobB deficient  
358 cells, but not for WT and CobB recovered cells (**Supplementary Fig. 16c**).  
359 We then examined the protein stability of YdeH mutants *in vitro* and  
360 found that YdeH<sup>WT</sup> and YdeH<sup>K4Q</sup> are less stable than YdeH<sup>K4A</sup> and YdeH<sup>K4R</sup>  
361 (**Supplementary figure 13**). In addition, we also noticed that the level of  
362 soluble YdeH following the addition of CobB is 2-fold of that in the  
363 absence of CobB (**Fig. 7e**).

364 Additionally, our data show that the c-di-GMP increase by 36% in WT  
365 cells than CobB deficient cells *in vivo* under exponential growth when  
366 YdeH was overexpressed (**Fig. 6g**). To understand the underlying  
367 mechanism, we then determined the level of YdeH when it was  
368 overexpressed in WT cells and CobB deficient cells. The results showed  
369 that the soluble YdeH level decreased ~45% in CobB deficient cells as  
370 compared to that of the WT cells (**Fig. 7f**), which is similar to that of the  
371 endogenous YdeH under exponential growth (**Fig. 7c**). We also measured  
372 the YdeH level in the sediment and observed significant amount of  
373 precipitated YdeH in CobB deficient cells as compared to that of WT and  
374 CobB recovered cells (**Fig. 7f**).

375 Thus, it appears as though YdeH K4 acetylation lead to protein  
376 aggregation/precipitation by reducing its solubility/stability (**Fig. 8a**). In  
377 WT cells, the acetylation of YdeH is removed by CobB and retained in  
378 soluble state, with little or undetectable protein sediment  
379 (**Supplementary Fig. 16c**). In CobB deficient cells, more acetylated YdeH  
380 will precipitate with both acetylated and/or deacetylated YdeH because  
381 of the lack of CobB deacetylation. Additionally, this model also explains  
382 why YdeH K4 may be frequently acetylated but cannot accumulate to  
383 high level *in vivo*. It is known that acetylation on specific sites promote  
384 protein aggregation<sup>42, 43</sup>. For example, K280 acetylation causes the  
385 aggregation of tau. And tau promotes neuronal survival, thus the  
386 acetylation induced tau aggregation is pathologically significant.  
387 Interestingly, tau K280 belongs to a double lysine motif, *i.e.*,  
388 <sup>275</sup>VQIINKK<sup>281</sup>, and YdeH K4 belongs to a similar double lysine motif, *i.e.*,  
389 <sup>1</sup>MIKK<sup>4</sup>. Thus, it is possible that the underlying mechanism of lysine  
390 acetylation induced protein aggregation of YdeH may be similar to that  
391 of tau. However, because of the possible complexity, the detailed  
392 mechanism is yet to be discovered.

393

## 394 **DISCUSSION**

395 c-di-GMP is a key secondary messenger in prokaryotes. CobB is the first,  
396 and major, protein deacetylase identified in prokaryotes. Herein, we  
397 discovered that c-di-GMP specifically binds to CobB and inhibits its

398 deacetylase activity, and down-regulates the cellular concentration of  
399 acetyl-CoA through modulation of the acetylation levels of Acs.  
400 Interestingly, we also found the major *E.coli* DGC, YdeH, is endogenously  
401 acetylated, and CobB enhances the solubility/stability of YdeH, and  
402 activates the DGC activity of YdeH, through deacetylation. Thus, we  
403 established a negative feedback regulatory loop between c-di-GMP  
404 biogenesis and CobB dependent protein deacetylation.

405

#### 406 **The binding region and kinetics of CobB and c-di-GMP**

407 The most well-known motif of c-di-GMP binding is the EXLXR motif<sup>44</sup>.  
408 Interestingly, the c-di-GMP binding site on CobB contains RXLXE, which is  
409 precisely EXLXR in reverse. As expected in the EXLXR motif, both R17 and  
410 E21 are critical for c-di-GMP binding, while the L19 residue does not  
411 directly bind to c-di-GMP in the RXLXE motif. This motif is located in the  
412 N-terminal tail of this protein that we found is responsible for its  
413 dimerization (**Supplementary Figure 3**). Since many of the c-di-GMP  
414 binding proteins are dimers or tetramers<sup>4, 31, 45</sup>, a plausible explanation  
415 for this effect of c-di-GMP described here is that c-di-GMP interferes  
416 with the dimerization of CobB.

417 A concern with our model though is that the  $K_d$  and  $K_i$  of c-di-GMP for  
418 CobB measured *in vitro* are larger than the sub- to micro-molar  
419 concentrations of c-di-GMP generally observed *in vivo*<sup>46</sup>. While this may

420 be owing to presently unidentified molecular factors that reduce this  
421 affinity *in vivo*, we believe that this discrepancy could be explained by  
422 the spatially and temporally uneven distribution of c-di-GMP in the  
423 bacteria. Indeed, direct measurement of the concentration of c-di-GMP  
424 in bacteria using a FRET biosensor has revealed a wide range of  
425 concentrations within individual cells<sup>47</sup>, including some  
426 resolution-limited locations ( $\sim 200 \times 200 \times 1000 \text{ nm}^3$ ) that exhibit a local  
427 concentration significantly greater than  $1 \mu\text{M}$ . We note that this  
428 concentration corresponds to only 25 molecules within this volume.  
429 Further, it is well known that the bacterial cytoplasm is extremely  
430 crowded<sup>48</sup>, and recent work has shown that, as a result, effectively,  
431 there are caging effects on the free diffusion of particles<sup>49</sup>. A single  
432 molecule of c-di-GMP within a “cage” of only  $20 \times 20 \times 100 \text{ nm}^3$  is at a  
433 concentration of  $40 \mu\text{M}$ . Thus, we speculate that it is indeed physically  
434 possible that the local concentration of c-di-GMP could exceed the  
435 measured affinity constants for CobB in the WT bacteria. In fact, owing  
436 to the mechanism described here, the negative regulatory loop involving  
437 CobB and YdeH may be principally responsible for keeping the local (and  
438 thus global) cytosolic concentration to the observed maximal levels.

439

440 **c-di-GMP regulates physiological functions through inhibiting of CobB**  
441 **deacetylation**

442 As the most important substrate of CobB, Acs is responsible for the  
443 synthesis of acetyl-CoA, which controls cell energy metabolism and  
444 global protein acetylation, and affects cell growth and proliferation<sup>50-52</sup>.  
445 Our results indicate that c-di-GMP can lower the concentration of  
446 acetyl-CoA *in vivo* through inhibiting CobB and increasing the acetylation  
447 level of Acs. Previous studies have identified several possible  
448 overlapping effects of c-di-GMP and acetyl-CoA. For example, c-di-GMP  
449 affects the expression of acetate kinase (AckA) through the binding of  
450 the transcription factor that regulates AckA transcription in *B.*  
451 *burgdorferi*<sup>53</sup>. In addition, acyl-CoA dehydrogenase, a key enzyme in  
452 acetyl-CoA metabolism pathways, is a genuine c-di-GMP effector in *B.*  
453 *bacteriovorus*<sup>54</sup>. Here, we strengthened the link between c-di-GMP and  
454 acetyl-CoA by showing, for the first time, that c-di-GMP directly  
455 modulates the biogenesis of acetyl-CoA.

456 c-di-GMP has emerged as a key regulator in the decision between  
457 motile and sedentary forms of bacteria<sup>2</sup>. Elevated c-di-GMP levels inhibit  
458 bacterial motility via effects on the flagella-associated protein<sup>6</sup>. Most  
459 recently, Nesper *et al.* found that c-di-GMP directly binds to the  
460 CheY-like regulators and tunes the bacterial flagellar motor<sup>9</sup>. According  
461 to our data, c-di-GMP can regulate the acetylation level of CheY via  
462 inhibition of the deacetylase activity of CobB. Thus, it is highly possible  
463 that c-di-GMP regulates bacterial motility through CobB-mediated

464 regulation of CheY activity.

465 CobB is a member of the sirtuin protein family, which are highly  
466 conserved across prokaryotes to eukaryotes. Thus, it is possible that  
467 c-di-GMP may also bind human sirtuins and play critical functional roles  
468 in a variety of biological processes, such as host-pathogen interactions.

469

#### 470 **CobB regulates the YdeH DGC activity *in vitro***

471 The overexpressed YdeH was used for DGC activity assay *in vitro*. We  
472 determined the K4 acetylation stoichiometry of the overexpressed YdeH  
473 following the same AQUA procedure that we used for the endogenous  
474 YdeH. The results showed that the overexpressed YdeH K4 acetylation  
475 stoichiometry is  $28.7 \pm 4.9\%$  (**Supplementary Fig. 14**). Assuming that all  
476 the K4 acetylation could be deacetylated by CobB, we could thus expect  
477 a ~1.4-fold activity increase upon CobB deacetylation. But it is still could  
478 not fully explain the 2-fold activity increase upon CobB deacetylation (**Fig.**  
479 **6f**). To this end, we sought to determine, with a simple model, whether  
480 the loss of stable YdeH could completely account for the 2-fold difference  
481 in c-di-GMP. In particular, based on the stability data (**Fig. 7e**), we  
482 considered the case in which the difference in c-di-GMP is completely  
483 owing to the decrease in soluble protein. Assuming that the substrate is  
484 not limiting throughout the assay and that steady state is achieved after  
485 a very short time, the lower amount of c-di-GMP produced would simply

486 be a result of the lower amount of soluble protein at any time point. We  
487 found that the decrease in soluble protein is well-described by a single  
488 exponential (**Supplementary Fig. 15**)

$$C \sim e^{-kt}$$

489 where  $C$  is the concentration of YdeH and  $k$  is the rate of the protein loss,  
490 determined to be  $0.49 \text{ hr}^{-1}$  in the fit. Thus, the fold-increase,  $F$ , expected  
491 for the fully stable (CobB treated) YdeH relative to the more unstable  
492 version can be calculated (for the 2 hrs assay) by

$$F = \frac{\int_0^2 dt}{\int_0^2 e^{-kt} dt} = \frac{2}{\left(\frac{1}{k}\right)(1 - e^{-2k})} = 1.57$$

493 with the aforementioned value of  $k$ . Thus, simple loss of the active  
494 protein would result in a 1.57-fold difference in c-di-GMP. Since we  
495 observed a 2-fold difference, we conclude that the loss of soluble protein  
496 can account for ~78% ( $1.57/2$ ) of the difference measured with the  
497 acetylated and deacetylated YdeH. Hence, a difference in the inherent  
498 activity between acetylated-YdeH and deacetylated-YdeH is needed to  
499 fully account for observed difference in c-di-GMP produced.

500 We noticed that the K4 acetylation stoichiometry of overexpressed  
501 YdeH is much high that of endogenous YdeH. The endogenous  
502 acetylation stoichiometry of YdeH K4 was measured using the  
503 exponential growth of *E. coli*. While as a common practice, when  
504 overexpress a protein in *E. coli*, the strain is usually induced at

505 exponential growth, and then cultured for another ~2 hours for fast  
506 protein producing. At the time of protein purification, the strain is  
507 already at stationary phase. Thus, it is possible that the big difference of  
508 acetylation stoichiometry between the overexpressed YdeH and the  
509 endogenous one is at least partially due to the difference of the growth  
510 phases.

511 To test this possibility, we measured the YdeH K4 acetylation  
512 stoichiometry using *E. coli* of stationary growth. The results showed that  
513 the YdeH K4 acetylation stoichiometry is  $1.1 \pm 0.3\%$  in WT cells and  $4.2 \pm$   
514  $0.5\%$  in CobB deficient cells (**Supplementary Fig. 16a-b**). For CobB  
515 deficient cells, the YdeH K4 acetylation stoichiometry is 3-fold  
516 ( $4.2\%/1.3\%$ ) in stationary growth than that of exponential growth. At  
517 least, this data could partially explain the stoichiometry gap between the  
518 endogenous and overexpressed YdeH.

519

### 520 **CobB regulates the YdeH DGC activity *in vivo***

521 It is known that the expression of YdeH is tightly regulated by the RNA  
522 binding protein CsrA and the *csrA* mutant can increase the  
523 transcription of YdeH in 15-fold and another DGC YcdT in 45-fold<sup>55</sup>. Thus,  
524 to artificially generate a condition of YdeH high expression for functional  
525 analysis, the *csrA* mutant has often been applied<sup>56</sup>. However, the *csrA*  
526 mutation can also activate the expression of another DGC, *i.e.*, YcdT,



527 which could cause high c-di-GMP background when studying YdeH. So,  
528 we chose to overexpress YdeH in *E. coli* to study the regulation role of  
529 CobB to YdeH inside the cell. Our data show that the c-di-GMP increase  
530 by 36% in WT cells than CobB deficient cells *in vivo* under exponential  
531 growth when YdeH was overexpressed (**Fig. 6g**), which is consistent with  
532 the observed 45% decrease of soluble YdeH level in CobB deficient cells  
533 than that of WT cells (**Fig. 7f**). Hence, the 36% lower c-di-GMP in CobB  
534 deficient cells is mainly due to the instability/ precipitation of YdeH.

535     Though it is clear now that the major functional consequence of K4  
536 acetylation is the decreasing of YdeH stability, the direct activity change  
537 upon acetylation and deacetylation by CobB may still play important role.  
538 Our results showed that YdeH<sup>K4A</sup>, which has comparable stability with  
539 WT YdeH, also exhibited a loss ~50 % of its DGC activity (**Fig. 6f**). It is  
540 possible that the YdeH K4 acetylation may significant affect the structure  
541 of YdeH. To understand the mechanism, we proposed a working model  
542 that illustrates how CobB could regulate the structure of YdeH, based on  
543 an analysis of the atomic structure of YdeH<sup>56</sup>. It has been reported that  
544 dimerization and proper conformational rearrangement of the active  
545 center are required for optimal YdeH DGC activity (**Supplementary Fig.**  
546 **17a**). Reside K4 is located within a “hinge” region of YdeH and may  
547 potentially regulate the conformational rearrangement of the active  
548 center upon dimer formation (**Supplementary Fig. 17b-d**). In the

549 acetylated form of K4, the two GGDEF catalytic domains of YdeH are  
550 misaligned that may cause the aggregation and then lead to precipitate.  
551 **(Supplementary Fig. 17b)** Besides, this misaligned region could prevent  
552 productive ligation of the two GTP molecules, each captured by a GGDEF  
553 domain. According to our enzymatic studies, it is very likely that  
554 deacetylation of YdeH K4ac triggers the proper realignment of the  
555 GGDEF dimer so that the active center is rearranged to allow the  
556 formation of intermolecular phosphoester bonds between the two GTP  
557 substrates **(Supplementary Fig. 17c)**. Interestingly, the proposed model  
558 is close to the Zn-regulation mechanism in YdeH, *i.e.*, inhibits YdeH's DGC  
559 activity by hindering its dimerization<sup>56</sup>. Thus, at least in part, CobB may  
560 regulate the active/inactive switch of DGC activity of YdeH through  
561 deacetylation of YdeH on K4 **(Supplementary Fig. 17d)**.

562

### 563 **The interplay between CobB and c-di-GMP**

564 Our data show that c-di-GMP can significantly reduce of the decetylation  
565 activity of CobB through direct binding, and that the deacetylation of  
566 overexpressed YdeH by CobB leads to an increase of c-di-GMP by 36% *in*  
567 *vivo*. In addition, c-di-GMP is synthesized from GTP by DGC. CobB  
568 regulates the levels of acetyl-CoA through deacetylating Acs and then  
569 modulates the generation of GTP in the tricarboxylic acid (TCA) cycle.  
570 Thus, to a certain extent, the biogenesis of c-di-GMP could be activated

571 by CobB through its effects on the TCA cycle. We also found that a  
572 GTPase Era and the DGC YegE are also endogenously acetylated. These  
573 results further demonstrate that the biogenesis of c-di-GMP is regulated  
574 by (de)acetylation.

575 The interplay between c-di-GMP and CobB may play important roles  
576 in bacteria. It is known that c-di-GMP participates in motility, biofilm  
577 formation and virulence, all of which are regulated by energy  
578 metabolism<sup>57, 58</sup>. We found that c-di-GMP modulates the bacterial  
579 energy metabolism through inhibiting the deacetylation activity of CobB,  
580 thus a connection between important bacterial processes and energy  
581 metabolism could be established. In addition, CobB is prominently  
582 implicated in the regulation of metabolism<sup>59</sup> and c-di-GMP is involved in  
583 GTP metabolism and purine metabolism, suggesting a possible two-way  
584 regulation between c-di-GMP and CobB at the metabolic level.

585 Taken together, we established a novel feedback regulation loop  
586 between c-di-GMP and the deacetylation activity of CobB (**Fig. 8b**). The  
587 findings of both directions (c-di-GMP inhibits CobB and CobB promotes  
588 c-di-GMP biogenesis) are novel. From this loop, we can envision a tightly  
589 regulated balance between the levels of c-di-GMP and the protein  
590 deacetylase activity of CobB. We strongly believe that our findings will  
591 facilitate future functional studies of both c-di-GMP and CobB-based  
592 regulation of protein acetylation.

593

## 594 **Methods**

### 595 **Bacterial Strains, Plasmids, and CobB Mutant Construction**

596 In this study, we used *E.coli* BW25113 as the wild type strain and the  
597 plasmid pSUMO10 for the overexpression of CobB, pET32a for the  
598 rescue experiment, and pCA24N for the overexpression of YdeH, Acs,  
599 CheY, NhoA, Era, YeaJ, YaiC, YahA, DosP, YihI, YegE and YihK. We  
600 performed the CobB mutations using the QuikChange® Site-Directed  
601 Mutagenesis Kit (Agilent Technologies, Santa Clara, USA).

602

### 603 ***E.coli* Proteome Microarray Screening and Data Processing**

604 The *E.coli* proteome microarrays were prepared as described  
605 previously<sup>29</sup>. The proteome microarrays were first blocked with blocking  
606 buffer (3% BSA in 0.1% Tween 20; TBST) for 1 h at room temperature.  
607 Bio-c-di-GMP was then diluted to 1  $\mu$ M incubated on the microarray at  
608 room temperature for 1 h, and the same concentration of biotin was  
609 included as a negative control. The microarrays were next washed with  
610 TBST three times for 5 min each and then were incubated with  
611 Cy3-Streptavidin at a 1:1000 dilution (Sigma-Aldrich, Darmstadt,  
612 Germany) for 1 h at room temperature, followed by three washes with  
613 TBST for 5 min each. The microarrays were spun dry at 250  $\times$  g for 3 min  
614 and were scanned with a GenePix pro 6.1 microarray scanner to visualize

615 and quantify the results. The raw data have been published in the  
616 Protein Microarray Database ([www.proteinarray.cn](http://www.proteinarray.cn)) with the accession  
617 number, PMDE271. The auto-analysis tool in Protein Microarray  
618 Database (<http://www.proteinarray.cn/index.php/analysis-toolkits>) was  
619 used to process the microarray data.

620

### 621 **Preparation of c-di-GMP**

622 It is known that c-di-GMP (BIOLOG Life Science Institute, Bremen,  
623 German) may form dimer or polymer, affects the binding with its  
624 effectors. Thus, we first determined the c-di-GMP monomer population.  
625 The  $OD_{276}$  and  $OD_{289}$  of c-di-GMP were measured using the cuvette  
626 mode of Nanodrop 2000c (Thermo Fisher Scientific, MA, USA) with a  
627 volume of 100  $\mu$ L. To calculate the ratio of monomer of c-di-GMP ( $P_{mono}$ )  
628 at various concentrations, we applied the equation ( $p_{mono} = 1.15$   
629  $(A_{276}/A_{289}) - 1.64$ ) developed by Gentner *et al.*<sup>60</sup> To eliminate the  
630 possible effect of c-di-GMP polymer, we heated the c-di-GMP solution in  
631 a water bath at 60°C for 1 h to depolymerize ~80% c-di-GMP to  
632 monomer before testing.

633

### 634 **Streptavidin blotting assay**

635 In this assay, CobB (0.5 mg/mL, 16.13  $\mu$ M) and 10  $\mu$ M bio-c-di-GMP were  
636 incubated in the deacetylation buffer (50 mM Tris-HCl, 4 mM  $MgCl_2$ , 50

637 mM NaCl, 50 mM KCl, 1 mM NAD<sup>+</sup>, pH 8.0) at 37°C for 1 h and the same  
638 amount of biotin, cGMP, c-di-AMP were included as negative controls.  
639 The samples were then UV-cross linked on ice with 10 min for 1.2  
640 mJ/cm<sup>2</sup> energy to further link the c-di-GMP to CobB. These samples were  
641 then analyzed by Western blotting. After incubation with IRDye 800-CW  
642 Conjugated Streptavidin (LI-COR Biosciences, Nebraska, USA) for 2 h, the  
643 membranes were washed with TBST three times and visualized with an  
644 Odyssey Infrared Imaging System (LI-COR Biosciences, Nebraska, USA).  
645 And the protein level was determined by Ponceau S staining is the  
646 (Sangon Biotech, Shanghai, China).

647

#### 648 **ITC assay**

649 In the ITC assay, c-di-GMP and the wild-type CobB and mutant CobB  
650 proteins were prepared in the titration buffer (20 mM Tris, 250 mM NaCl,  
651 2 mM DTT, and pH 7.5). Protein concentrations were measured based on  
652 the UV 280nm absorption. The ITC titrations were performed using a  
653 MicroCal iTC200 system (GE Healthcare, Pittsburgh, USA) at 25°C. Each  
654 titration consisted of 17 successive injections (the first at 0.4 μL and the  
655 remaining 16 at 2.4 μL). The stock c-di-GMP, cGMP and c-di-AMP at 1.5  
656 mM were titrated into wild-type or mutant CobB (0.1 mM) in the sample  
657 cells of 200 μL volume individually. c-di-GMP, cGMP and c-di-AMP of 1.5  
658 mM were titrated into 200 μL titration buffer as controls for data

659 processing. The resultant titration curves were processed using the  
660 Origin 7.0 software program (OriginLab) according to the “one set of  
661 sites” fitting model.

662

### 663 **CobB deacetylase activity assay**

664 CobB (50 µg/mL, 1.6 µM) and c-di-GMP (at either 0.25 or 0.5 mM) were  
665 incubated in 20 µL deacetylation buffer (50 mM Tris-HCl, 4 mM MgCl<sub>2</sub>,  
666 50 mM NaCl, 50 mM KCl, 1 mM NAD<sup>+</sup>, pH 8.0) at 37°C for 0.5 h. For  
667 negative controls, we used 0.5 mM cGMP and c-di-AMP. The CobB  
668 substrates (4.16 µM Acs, 1.41 µM CheY, 0.62 µM NhoA) were then  
669 added and incubated at 37°C for 1.5 h. These proteins were analyzed by  
670 both silver staining and Western blotting. Membranes were incubated  
671 with a pan anti-acetyl antibody (Cell Signaling Technology, MA, USA,  
672 with a 1:1000 dilution) for at 4°C for 12 h and then incubated with an  
673 IRDye 800 secondary antibody at room temperature for 1 h. The  
674 membranes were visualized with an Odyssey Infrared Imaging System.

675

### 676 **Measuring the catalytic kinetics of CobB**

677 CobB (9.3 µg/mL, 0.3 µM) was incubated with 0, 10, 20 and 80 µM  
678 c-di-GMP at 37°C for 20 min in 80 µL deacetylation buffer, and then 20  
679 µL gradient concentrations acylated peptide  
680 (LEQIAELAGVSK<sup>ac</sup>TNLLYYFPSK)<sup>32</sup> (1, 2, 4, 8, 16, 32, 50, 75, 100, 150 and

681 200  $\mu$ M) were added and co-incubated at 37°C for 30 min. 100 mM HCl  
682 and 160 mM acetic acid were added to stop the reactions and spun for  
683 10 min at 18,000 x g to separate the enzyme from the reactions. These  
684 samples were analyzed by HPLC. Briefly, samples were injected onto a  
685 C-18 column (Alltima™ C18 4.6 x 250 mm) and analyzed by  
686 reversed-phase HPLC (Shimadzu, Japan). Solution A (0.065%  
687 trifluoroacetic acid in 100% water (v/v)) and solution B (0.05%  
688 trifluoroacetic acid in 100% acetonitrile (v/v)) were used in a gradient  
689 program (0.01 min with 5% Solution B, 25 min with 65% Solution B,  
690 25.01 min with 95% Solution B, 31 min with 95% Solution B, 31.01 min  
691 with 5% Solution B, 40 min with 5% Solution B and stop in 40.01 min)  
692 with a flow rate of 1 mL/min. Peptides were detected at 220 nm  
693 wavelength. This assay was performed three preparations and  $V_{max}$ ,  $K_i$   
694 values were calculated by curve-fitting the plot using GraphPad Prism 6.

695

## 696 **Construction of an *E.coli* strain (BW25113) harboring chromosomal**

### 697 **3xFLAG-tagged Acs and 3xFLAG-tagged YdeH**

698 *E.coli* strain (BW25113) harboring chromosomal 3xFLAG-tagged Acs and  
699 3xFLAG-tagged YdeH were constructed using the Red recombination  
700 system<sup>61</sup>, as described previously<sup>32</sup>.

701

## 702 **Isolation and Quantification of c-di-GMP in *E.coli***



703 The c-di-GMP isolation methods were described previously<sup>62</sup>. Briefly, the  
704 total amount of *E.coli* cells with a 50 OD were harvested and  
705 re-suspended in 2 mL ddH<sub>2</sub>O. To extract intracellular c-di-GMP, 8 mL  
706 extract mixture of 50% methanol and 50% acetonitrile were added. We  
707 also added 1 μM cGMP as the reference. The mixture was incubated in  
708 boiling water for 10 min and then centrifuged at 10,000 rpm for 10 min.  
709 The supernatant was transferred to a new tube for freeze-drying. The  
710 freeze-dried pellet was re-suspended in 100 μL water containing 50%  
711 methanol. Samples were analyzed by UPLC-IM-MS (Ultra  
712 high-performance liquid chromatography coupled ion mobility mass  
713 spectrometry). UPLC-IM-MS was performed using a Waters UPLC I-class  
714 system equipped with a binary solvent delivery manager and a sample  
715 manager, coupled with a Waters VION IMS Q-TOF Mass Spectrometer  
716 equipped with an electrospray interface (Waters Corporation, Milford,  
717 USA) at the Instrumental Analysis Center of Shanghai Jiao Tong  
718 University. UPLC was performed on a ZIC-HILIC column (100 mm × 2.1  
719 mm i.d., 3.5 μm; Merck). The column was eluted with gradient solvent  
720 from A: B (5: 95) to A: B (40: 60) at a flow rate of 0.40 mL/min, where A is  
721 50 mM ammonium formate and B is acetonitrile. We employed the  
722 following MS experimental parameters: a negative polarity with 2.0 kV  
723 capillary voltage, 20 V sampling cone and 6 eV collision energy. c-di-GMP  
724 was detected in M-1 ion of  $m/z$  689.086 with a fragment ion of  $m/z$

725 344.040, and cGMP as an input in M-1 ion of  $m/z$  344.039.

726

### 727 **The SILAC MS assay of quantitative acetylation proteomics**

728 *E.coli* BW25113 ( $\Delta lysA$ ) and BW25113 with YdeH overexpression ( $\Delta lysA$

729  $ydeH^+$ ) were subjected for SILAC MS assay. The two strains were

730 activated in LB medium, and then were cultured in 2% glucose M9

731 minimal media supplemented with heavy isotopes of lysine

732 ( $^{13}C_6^{14}N_2$ -lysine) or light isotopes of lysine ( $^{12}C_6^{14}N_2$ -lysine) (Silantes,

733 Munich, Germany) for  $\Delta lysA$  and  $\Delta lysA ydeH^+$ , respectively. Strains were

734 induced by 0.1 mM IPTG during exponential growth (OD 600nm =  $\sim 0.4$ )

735 and the cells were harvested after inducing for 4 h (OD 600nm =  $\sim 1.0$ ).

736 These cells ( $\sim 30$  OD) were added with 1 mL lysis buffer (8 M Urea, 100

737 mM  $NH_4HCO_3$ , 2 mM sodium butyrate, 5 mM nicotinamide, 1x protease

738 inhibitor (Roche, Basel, Switzerland), pH 8.0) and lysed for 2 min at 4°C

739 by an Ultrasonic Cell Disruptor (Cheng-cheng Weiye Science and

740 Technology, Beijing, China). Protein concentration was determined by

741 BCA kit (Pierce, MA, USA). The labeling efficiency of *E.coli* cultured in

742 “heavy” medium was checked before sequential proteomic experiments.

743 Light-labeled and heavy-labeled lysate were equally mixed. Cysteine

744 bonds were reduced by 5 mM dithiothreitol (DTT) at 56°C for 30 min and

745 followed by alkylation reaction with 15 mM iodoacetamide at room

746 temperature in darkness for 30 min. The alkylation reaction was

747 quenched by 30 mM cysteine. The protein solution was diluted to less  
748 than 2 M Urea by addition of 100 mM  $\text{NH}_4\text{HCO}_3$  (pH 8.0) and then  
749 digested with sequencing grade trypsin at a trypsin-to-protein ratio of 1:  
750 50 (w/w) at 37°C for 16 h. For complete digestion, additional trypsin was  
751 added at trypsin-to-protein ratio of 1: 100 (w/w) at 37°C for another four  
752 hours. The tryptic peptides were desalted through SepPak C18 cartridges  
753 (Waters, MA, USA) and vacuum dried.

754 To enrich the lysine acetylated peptides, 2 mg desalted peptides  
755 were dissolved in NETN buffer (600 mM NaCl, 1 mM EDTA, 50 mM  
756 Tris-HCl, 0.5% NP-40, pH 8.0) and incubated with 10  $\mu\text{L}$  drained  
757 pre-washed anti-acetyl beads (Immunechem, Burnaby, Canada) at 4°C  
758 overnight with gentle shaking. The beads were gently washed for four  
759 times with NETN buffer and twice with deionized water. The bound  
760 peptides were eluted with 0.1% TFA and vacuum dried. The eluted  
761 peptides were desalted with C18 ZipTips (Millipore, MA, USA) according  
762 to the manufacturer's instructions.

763 Enriched acetylated peptides were analyzed by nano flow LC-MS/MS  
764 using an EASY-nLC 1000 system connected to Orbitrap Fusion mass  
765 spectrometer (Thermo Fisher Scientific, MA, USA). Peptides were  
766 dissolved in solvent A (0.1% FA in 2% ACN) and separated using a  
767 homemade reverse-phase C18 analytical column (75  $\mu\text{m}$  ID  $\times$  18 cm  
768 length, 3  $\mu\text{m}$  particle size) with a 90-min gradient from 5% to 80%

769 solvent B (0.1% FA in 90% ACN) at a constant flow rate of 300 nL/min.  
770 Intact peptides with m/z 300-1400 were detected at a resolution of  
771 120,000 at m/z 200. Ions with intensity above 5,000 were isolated and  
772 sequentially fragmentized by Higher Collision Dissociation (HCD) with  
773 normalized collision energy of 32% in top speed mode. The automatic  
774 gain control (AGC) targets were set at 5.0e5 for full scan and 7.0e3 for  
775 MS/MS scan, respectively. The dynamic exclusion duration was set as  
776 30s.

777 MS/MS data files were processed with MaxQuant software (version  
778 1.5.3.8) against *Escherichia coli* (strain K12) database from Uniprot  
779 (proteome ID: UP000000625, 4309 sequences, last modified on May  
780 13th, 2017) with a reversed decoy database. SILAC was selected as  
781 “doublets” and “Heavy labels” panel was selected as heavy lysine (Lys6).  
782 Trypsin/P was chosen as the digestion enzyme and two maximum  
783 missing cleavages was allowed. Carbamidomethyl (C) was specified as  
784 the fixed modification and variable modifications were oxidation (M),  
785 acetylation (Protein N-term) and acetylation (K). False discovery rates  
786 (FDR) at protein, peptide and modification level were all set as 1%. For  
787 quantitative analysis, the normalized H/L ratio of each acetylated  
788 peptide exported by MaxQuant software was corrected at the protein  
789 level to eliminate the protein abundance difference. The SILAC mass  
790 spectrometry proteomics raw data have been deposited to the

791 ProteomeXchange<sup>63</sup> Consortium via the PRIDE<sup>64</sup> partner repository with  
792 the dataset identifier PXD007616 (Username: reviewer16485@ebi.ac.uk,  
793 Password: dD4exhSO).

794

#### 795 **Identification of deacetylation sites by Q Exactive plus MS**

796 Five proteins of the DGC pathway, YdeH, Era, YegE, YeaJ and YihK were  
797 constructed to Pca24N and purified from *E.coli* BL21. After SDS-PAGE  
798 separation and tryptic digestion, these proteins were mixed and  
799 analyzed by mass spectrometry. Briefly, nanoLC–MS/MS-experiments  
800 were performed on an EASY-nLC system (Thermo Scientific, Odense,  
801 Denmark) connected to a Q Exactive Plus (Thermo Scientific, Bremen,  
802 Germany) through a nanoelectrospray ion source. Samples (1 µL) were  
803 loaded by an autosampler onto a 2-cm packed pre-column (75 µm ID x  
804 360 µm OD) in 0.1% HCOOH/water (buffer A) at a flow rate of 1 µL/min  
805 for 5 min. Analytical separation was performed over a 15-cm packed  
806 column (75 µm ID x 360 µm OD) at 300 nL/min with a 60 mins gradient  
807 of increasing CH<sub>3</sub>CN (buffer B, 0.1% HCOOH/CH<sub>3</sub>CN). Both pre-column (5  
808 µm diameter, 200 Å pore size) and analytical column (3 µm diameter,  
809 100 Å pore size) were packed with C18-reversed phase silica  
810 (DIKMA-inspire TM, CA, USA) using a pressure bomb. Following sample  
811 loading, buffer B was increased rapidly from 3% to 6% over 5min and  
812 then shallowly to 22% over 36 min, and then to 35% over 9 min followed

813 by a quick increase to 95% over 3min, and hold at 95% for 7 min. The  
814 total acquisition duration lasted for 60 min. The Q Exactive Plus mass  
815 spectrometer was operated in the data dependent mode to  
816 automatically switch between full scan MS and MS/MS acquisition.  
817 Survey full scan MS spectra (m/z 350–1800) were acquired in the  
818 Orbitrap with 70 000 resolution (m/z 200) after accumulation of ions  
819 to a  $3 \times 10^6$  target value based on predictive AGC from the previous full  
820 scan. Dynamic exclusion was set to 60 s. The 15 most intense multiply  
821 charged ions ( $z \geq 2$ ) were sequentially isolated and fragmented in the  
822 octupole collision cell by higher-energy collisional dissociation (HCD)  
823 with affixed injection time of 55 ms and 17500 resolutions for the fast  
824 scanning method. Typical mass spectrometric conditions were as follows:  
825 spray voltage, 1.7 kV; heated capillary temperature, 320°C; normalized  
826 HCD collision energy 27%. The MS/MS ion selection threshold was set to  
827  $9 \times 10^3$  counts. A 1.6 Da isolation width for the samples was chosen. The  
828 mass spectrometry raw data have been submitted to PRIDE<sup>63, 64</sup> with  
829 project accession PXD007651 (User: reviewer60424@ebi.ac.uk,  
830 password: 6rxEMkjm). And the raw data file was named  
831 “20161202\_ZHN\_AC.raw” with the search file  
832 “20161202\_ZHN\_AC-01.ms”.

833 YdeH was chosen for in-depth quantitative MS analysis using Q  
834 Exactive plus mass spectrometer. YdeH was overexpressed in *E. coli* and

835 affinity purified. YdeH was treated with CobB for deacetylation and  
836 untreated WT YdeH as the control. After SDS-PAGE separation and  
837 trypsin digestion, the samples were analyzed by Q Exactive plus mass  
838 spectrometer under the same experiment condition. The MS raw data  
839 was processed using Protein Discovery software (ThermoFisher) to  
840 identify the lysine acetylation sites. The acetylation sites, which were  
841 identified in untreated WT YdeH sample but not in CobB treated sample,  
842 were considered to be deacetylated by CobB. The mass spectrometry  
843 raw data have been submitted to PRIDE with project accession  
844 PXD008113 (Username: reviewer00527@ebi.ac.uk, password:  
845 jKBngFLH).

846

#### 847 **Determination of the deacetylation activity of CobB *in vivo***

848 The strains,  $\Delta cobB$ , WT,  $ydeH^+$ ,  $ydeH^{G206A,G207A}$ ,  $\Delta cobB::cobB$ ,  $\Delta$   
849  $cobB::cobB ydeH^+$  were used for to assay the deacetylation activity of  
850 CobB. These strains were grown in Vogel-Bonner medium (0.81 mM  
851  $MgSO_4 \cdot 7H_2O$ , 43.8 mM  $K_2HPO_4$ , 10 mM  $C_6H_8O_7 \cdot H_2O$ , 16.7 mM  
852  $NaNH_4HPO_4 \cdot 4H_2O$ ) with 10 mM acetate at 25°C for 12 h and induced by  
853 0.2 mM IPTG at 25°C for 12 h. 20 OD cells were harvested and  
854 repeatedly freeze-thawed three times. The cells were then treated with  
855 4mL lysis buffer (50 mM  $NaH_2PO_4$ , 300 mM NaCl, 10 mM imidazole  
856 (Sigma-Aldrich), 1mg/mL lysozyme (Sangon Biotech, Shanghai, China), 1x

857 CellLytic B (Sigma-Aldrich), 50 units/mL of Benzonase (Sigma-Aldrich) and  
858 1 mM PMSF (Sigma-Aldrich), pH 8.0) at 4°C for 20 min with vigorous  
859 shaking. After lysis and centrifugation at 10,000 rpm for 5 min, 20 µL  
860 anti-FLAG antibody (Sigma-Aldrich) and 50 µL protein G conjugated  
861 agarose beads (Roche) were added at 4°C for 2 h with gentle agitation to  
862 enrich the 3xFLAG-tagged Acs. Protein G conjugated agarose was  
863 harvested and washed three times by buffer A (50 mM NaH<sub>2</sub>PO<sub>4</sub>, 300  
864 mM NaCl, 10 mM imidazole, pH 8.0). The 3xFLAG-tagged Acs was then  
865 eluted by heating at 95°C for 10 min. The amount of Acs protein and  
866 deacetylation level of these samples were analyzed by western blotting.  
867 Membranes were incubated with the pan anti-acetyl antibody (Cell  
868 Signaling Technology with a 1:1000 dilution) for at 4°C for 16 h and an  
869 anti-FLAG antibody (Sigma-Aldrich with a 1:2000 dilution) at 4°C for 16 h.  
870 The IRDye 800 antibody was used as a secondary antibody, and  
871 membranes were incubated for 1 h at room temperature. The  
872 membranes were washed three times in TBST between each antibody  
873 incubation step. Final visualization was performed using an Odyssey  
874 Infrared Imaging System.

875

#### 876 **Determination of the strain growth curve in Vogel-Bonner medium**

877 The strains described above were grown in Vogel-Bonner medium with  
878 10 or 30 mM acetate or propionate at 25°C for 12 h and then induced by



879 0.2 mM IPTG at 25°C for 20 h. During the entire 32 h growth period, the  
880 cell concentrations were measured at OD<sub>600</sub> using Nanodrop 2000s at 8,  
881 12, 16, 24 and 32 h. The growth curves were then drawn using GraphPad  
882 Prism 6.

883

### 884 **Homology analysis, phylogenetic tree construction, and sequence** 885 **alignment**

886 The 25 bacteria that we selected for homology analysis were *Escherichia*  
887 *coli*, *Salmonella typhimurium*, *Yersinia pestis*, *Shigella dysenteriae*,  
888 *Citrobacter amalonaticus*, *Erwinia tracheiphila*, *Vibrio parahaemolyticus*,  
889 *Klebsiella oxytoca*, *Cedecea neteri*, *Achromobacter sp.ATCC35328*,  
890 *Siccibacter colletis*, *Lelliottia amnigena*, *Buttiauxella brennerae*, *Kluyvera*  
891 *ascorbata*, *Mangrovibacter sp.MFB070*, *Cronobacter dublinensis*, *Hafnia*  
892 *alvei*, *Chania multitudinisentens*, *Serratia symbiotica*, *Yokenella*  
893 *regensburgei*, *Trabulsiella odontotermis*, *Leclercia adecarboxylata*,  
894 *Pantoea dispersa*, *Shimwellia blattae*, *Kosakonia radicincitans*. The CobB  
895 sequences were examined at the NCBI website and the phylogenetic  
896 tree was constructed by EMBL-EBI Clustalw2 online tool. Sequence  
897 alignment was performed using DNAMAN 2.0.

898

### 899 **Determination of the YdeH DGC activity**

900 The purified WT YdeH 5 uM (0.14mg/ml) protein was incubated with

901 CobB 1.6  $\mu$ M (0.05mg/ml) for deacetylating at 37°C for 30 min. For DGC  
902 activity determination, the WT YdeH, deacetylated YdeH and YdeH  
903 mutants were incubated with 1 mM GTP, 5 mM MgCl<sub>2</sub> in 100  $\mu$ l at 30°C  
904 for 2 h. The reaction was terminated with heating at 95°C for 10 min  
905 and spun for 10 min at 18,000 g to separate the enzyme from the  
906 reactions. Before analyzed, we add 2  $\mu$ M cGMP to these reactions as the  
907 control. The c-di-GMP concentrations were determined by UPLC-IM-MS  
908 with the same parameters as mentioned earlier.

909

#### 910 **Determination of the YdeH K4 acetylation stoichiometry using AQUA** 911 **quantification**

912 We used the absolute quantification (AQUA) method<sup>39, 40</sup> to quantify the  
913 peptide levels. We synthesized the AQUA peptides for deacetylated  
914 (KTTEIDAIL(<sup>13</sup>C<sub>6</sub>, <sup>15</sup>N)LNLNK and TTEIDAIL(<sup>13</sup>C<sub>6</sub>, <sup>15</sup>N)LNLNK) and acetylated  
915 peptides (K<sup>ac</sup>TTEIDAIL(<sup>13</sup>C<sub>6</sub>, <sup>15</sup>N)LNLNK) of YdeH K4. To acquire the  
916 endogenous YdeH protein, we inserted a chromosomal C-terminal  
917 Flag-tag to YdeH and immuno-precipitated by an anti-FLAG antibody.  
918 The strains,  $\Delta$ *cobB* and WT, were used for to assay the YdeH K4  
919 acetylation stoichiometry. These strains were grown in LB medium  
920 overnight and transfer to 1 L VB-E medium with 1:500 dilution and  
921 grown to OD<sub>600</sub> = ~0.3 at 25°C for 16 h as the exponential growth cells  
922 and to OD<sub>600</sub> = ~0.6 at 25°C for 42 h as the stationary phase cells. These

923 cells were harvested and lysed by high pressure with 50 mL lysis buffer  
924 (50 mM NaH<sub>2</sub>PO<sub>4</sub>, 300 mM NaCl, and 1 mM PMSF (Sigma-Aldrich), pH  
925 8.0). After lysis and centrifugation at 10,000 rpm for 5 min, 100 μL  
926 anti-FLAG antibody (Sigma-Aldrich) was added and incubated at 4°C for  
927 20 h with gentle agitation to enrich the 3xFLAG-tagged YdeH. 300 μL  
928 protein G conjugated agarose beads (Roche) were added and incubated  
929 at 4°C for 4 h with gentle agitation to enrich the anti-Flag antibody.  
930 Protein G conjugated agarose was harvested and washed for three times  
931 by buffer A (50 mM NaH<sub>2</sub>PO<sub>4</sub>, 300 mM NaCl, pH 8.0). The 3xFLAG-tagged  
932 YdeH was eluted by 2 mL 0.2 mg/mL Flag peptide at 4°C for 4 h. The free  
933 Flag peptide was separated through dialysis.

934 To acquire the overexpressed YdeH, we constructed the YdeH to  
935 pCA24N in  $\Delta cobB$  strain ( $\Delta cobB ydeH^+$ ). This strain was grown in LB  
936 medium overnight and transfer to 100 mL LB medium with 1:100  
937 dilution and grown to OD<sub>600</sub> = ~0.6 at 37°C for 2 h, 0.1 mM IPTG was  
938 added to induce at 37°C for 2 h. The cell was harvested and lysed with  
939 35 mL lysis buffer. After lysis and centrifugation at 10,000 rpm for 5 min,  
940 1 mL Ni-IDA beads (Senhuimicrosphere, Suzhou, China) was added and  
941 incubated at 4°C for 1 h with gentle agitation to enrich the His-tagged  
942 YdeH. The His-tagged YdeH was eluted by 250 mM imidazole at 4°C for  
943 20 min. The free imidazole was separated through dialysis.

944 For YdeH acetylation stoichiometry, affinity purified YdeH proteins

945 were digested by trypsin overnight after cysteine reduction and  
946 alkylation reaction. Then tryptic peptides were desalted. The synthetic  
947 AQUA standard peptides were spiked into the digested YdeH samples  
948 with the close MS intensity to the native peptides. Peptide mixture  
949 containing AQUA peptides were analyzed by Q-Exactive mass  
950 spectrometer with three independent measurements. Full MS scan  
951 mode was used and the scan range was set as 700 to 900 m/z,  
952 containing all three targeted peptides. Extracted ion chromatography  
953 (XIC) peak areas of native peptide and corresponding heavy labeled  
954 peptide were used for stoichiometry calculation. The mass spectrometry  
955 proteomics raw data have been deposited to the ProteomeXchange<sup>63</sup>  
956 Consortium via the PRIDE<sup>64</sup> partner repository with the dataset identifier  
957 PXD007616 (Username: reviewer16485@ebi.ac.uk, Password:  
958 dD4exhSO).

959

#### 960 **Determination of stability of YdeH *in vitro***

961 After overexpressed in CobB deficient cells, YdeH was purified and  
962 diluted to 0.14 mg/mL, followed with or without CobB treatment. These  
963 samples were incubated at 37°C for deacetylation for 0.5 h. Then 1 mM  
964 GTP was added, the samples were incubated at 30°C for another 1 h  
965 and 2h. These samples were centrifuged at 12,000 g for 10 min to  
966 separate the soluble protein from the precipitation.

967 For YdeH mutants, these were diluted to 0.14 mg/mL incubated at  
968 37°C for 0.5 h. Then 1 mM GTP was added, the samples were incubated  
969 at 30°C for another 1 h and 2h. These samples were centrifuged at  
970 12,000 g for 10 min to separate the soluble protein from the  
971 precipitation.

972

### 973 **Statistical analysis**

974 Graphs were plotted using GraphPad Prism 6 and the statistical analyses  
975 were performed using Excel. Pairwise comparisons were performed  
976 using two-tailed Student's *t*-test, and statistical significance was set at *P*  
977 < 0.05. Error bars represent the mean ± standard errors of mean (S.E.M.).

978

### 979 **References**

- 980 1. ROSS, P. *et al.* Regulation of cellulose synthesis in *Acetobacter xylinum* by cyclic diguanylic  
981 acid. *Nature* 325, 279-281 (1987).
- 982 2. Hengge, R. Principles of c-di-GMP signalling in bacteria. *Nature reviews. Microbiology* 7,  
983 263-273 (2009).
- 984 3. Jenal, U., Reinders, A. & Lori, C. Cyclic di-GMP: second messenger extraordinaire. *Nature*  
985 *reviews. Microbiology* (2017).
- 986 4. Bush, M.J., Tschowri, N., Schlimpert, S., Flardh, K. & Buttner, M.J. c-di-GMP signalling and  
987 the regulation of developmental transitions in streptomycetes. *Nature reviews.*  
988 *Microbiology* 13, 749-760 (2015).
- 989 5. Nesper, J., Reinders, A., Glatter, T., Schmidt, A. & Jenal, U. A novel capture compound for  
990 the identification and analysis of cyclic di-GMP binding proteins. *Journal of Proteomics* 75,  
991 4874-4878 (2012).
- 992 6. Paul, K., Nieto, V., Carlquist, W.C., Blair, D.F. & Harshey, R.M. The c-di-GMP binding protein  
993 YcgR controls flagellar motor direction and speed to affect chemotaxis by a "backstop  
994 brake" mechanism. *Molecular cell* 38, 128-139 (2010).
- 995 7. Lori, C. *et al.* Cyclic di-GMP acts as a cell cycle oscillator to drive chromosome replication.  
996 *Nature* 523, 236-239 (2015).
- 997 8. Tschowri, N. *et al.* Tetrameric c-di-GMP mediates effective transcription factor

- 998 dimerization to control *Streptomyces* development. *Cell* 158, 1136-1147 (2014).
- 999 9. Nesper, J. *et al.* Cyclic di-GMP differentially tunes a bacterial flagellar motor through a  
1000 novel class of CheY-like regulators. *Elife* 6 (2017).
- 1001 10. Schirmer, T. C-di-GMP Synthesis: Structural Aspects of Evolution, Catalysis and Regulation.  
1002 *J. Mol. Biol.* 428, 3683-3701 (2016).
- 1003 11. Ryan, R.P. *et al.* Cell-cell signaling in *Xanthomonas campestris* involves an HD-GYP domain  
1004 protein that functions in cyclic di-GMP turnover. *Proceedings of the National Academy of  
1005 Sciences of the United States of America* 103, 6712-6717 (2006).
- 1006 12. Schmidt, A.J., Ryjenkov, D.A. & Gomelsky, M. The ubiquitous protein domain EAL is a cyclic  
1007 diguanylate-specific phosphodiesterase: Enzymatically active and inactive EAL domains.  
1008 *Journal of bacteriology* 187, 4774-4781 (2005).
- 1009 13. Christen, M., Christen, B., Folcher, M., Schauerte, A. & Jenal, U. Identification and  
1010 characterization of a cyclic di-GMP-specific phosphodiesterase and its allosteric control by  
1011 GTP. *J. Biol. Chem.* 280, 30829-30837 (2005).
- 1012 14. Boehm, A. *et al.* Second messenger signalling governs *Escherichia coli* biofilm induction  
1013 upon ribosomal stress. *Molecular microbiology* 72, 1500-1516 (2009).
- 1014 15. Tuckerman, J.R. *et al.* An oxygen-sensing diguanylate cyclase and phosphodiesterase  
1015 couple for c-di-GMP control. *Biochemistry* 48, 9764-9774 (2009).
- 1016 16. Ko, M. & Park, C. Two novel flagellar components and H-NS are involved in the motor  
1017 function of *Escherichia coli*. *J Mol Biol* 303, 371-382 (2000).
- 1018 17. Doerks, T., Copley, R.R., Schultz, J., Ponting, C.P. & Bork, P. Systematic identification of  
1019 novel protein domain families associated with nuclear functions. *Genome research* 12,  
1020 47-56 (2002).
- 1021 18. Spangler, C., Kaefer, V. & Seifert, R. Interaction of the diguanylate cyclase YdeH of  
1022 *Escherichia coli* with 2',(3')-substituted purine and pyrimidine nucleotides. *The Journal of  
1023 pharmacology and experimental therapeutics* 336, 234-241 (2011).
- 1024 19. Imai, S. & Guarente, L. Ten years of NAD-dependent SIR2 family deacetylases: implications  
1025 for metabolic diseases. *Trends Pharmacol. Sci.* 31, 212-220 (2010).
- 1026 20. Greiss, S. & Gartner, A. Sirtuin/Sir2 phylogeny, evolutionary considerations and structural  
1027 conservation. *Mol. Cells* 28, 407-415 (2009).
- 1028 21. Tucker, A.C. & Escalante-Semerena, J.C. Biologically Active Isoforms of CobB Sirtuin  
1029 Deacetylase in *Salmonella enterica* and *Erwinia amylovora*. *Journal of bacteriology* 192,  
1030 6200-6208 (2010).
- 1031 22. Starai, V.J., Celic, I., Cole, R.N., Boeke, J.D. & Escalante-Semerena, J.C. Sir2-dependent  
1032 activation of acetyl-CoA synthetase by deacetylation of active lysine. *Science* 298,  
1033 2390-2392 (2002).
- 1034 23. Li, R. *et al.* CobB regulates *Escherichia coli* chemotaxis by deacetylating the response  
1035 regulator CheY. *Molecular microbiology* 76, 1162-1174 (2010).
- 1036 24. Zhang, Q.F. *et al.* Reversibly acetylated lysine residues play important roles in the  
1037 enzymatic activity of *Escherichia coli* N-hydroxyarylamine O-acetyltransferase. *The FEBS  
1038 journal* 280, 1966-1979 (2013).
- 1039 25. Zhou, Q., Zhou, Y.N., Jin, D.J. & Tse-Dinh, Y.-C. Deacetylation of topoisomerase I is an  
1040 important physiological function of *E. coli* CobB. *Nucleic acids research* (2017).
- 1041 26. Hentchel, K.L. & Escalante-Semerena, J.C. Complex regulation of the sirtuin-dependent

- 1042 reversible lysine acetylation system of *Salmonella enterica*. *Microbial cell (Graz, Austria)* 2,  
1043 451-453 (2015).
- 1044 27. Hentchel, K.L., Thao, S., Intile, P.J. & Escalante-Semerena, J.C. Deciphering the Regulatory  
1045 Circuitry That Controls Reversible Lysine Acetylation in *Salmonella enterica*. *Mbio* 6 (2015).
- 1046 28. Avalos, J.L., Bever, K.M. & Wolberger, C. Mechanism of sirtuin inhibition by nicotinamide:  
1047 altering the NAD(+) cosubstrate specificity of a Sir2 enzyme. *Molecular cell* 17, 855-868  
1048 (2005).
- 1049 29. Chen, C.S. *et al.* A proteome chip approach reveals new DNA damage recognition activities  
1050 in *Escherichia coli*. *Nature methods* 5, 69-74 (2008).
- 1051 30. Kramer, K. *et al.* Photo-cross-linking and high-resolution mass spectrometry for assignment  
1052 of RNA-binding sites in RNA-binding proteins. *Nature methods* 11, 1064-1070 (2014).
- 1053 31. Shu, C., Yi, G., Watts, T., Kao, C.C. & Li, P. Structure of STING bound to cyclic di-GMP reveals  
1054 the mechanism of cyclic dinucleotide recognition by the immune system. *Nature structural  
1055 & molecular biology* 19, 722-724 (2012).
- 1056 32. Tu, S. *et al.* YcgC represents a new protein deacetylase family in prokaryotes. *Elife* 4 (2015).
- 1057 33. Liu, F.Y., Gu, J., Wang, X.D., Zhang, X.E. & Deng, J.Y. Acs is essential for propionate  
1058 utilization in *Escherichia coli*. *Biochem. Biophys. Res. Commun.* 449, 272-277 (2014).
- 1059 34. Weinert, B.T. *et al.* Acetyl-phosphate is a critical determinant of lysine acetylation in *E. coli*.  
1060 *Molecular cell* 51, 265-272 (2013).
- 1061 35. Castano-Cerezo, S. *et al.* Protein acetylation affects acetate metabolism, motility and acid  
1062 stress response in *Escherichia coli*. *Molecular systems biology* 10, 762 (2014).
- 1063 36. Chou, S.H. & Galperin, M.Y. Diversity of Cyclic Di-GMP-Binding Proteins and Mechanisms.  
1064 *Journal of bacteriology* 198, 32-46 (2016).
- 1065 37. Wang, Q.J. *et al.* Acetylation of Metabolic Enzymes Coordinates Carbon Source Utilization  
1066 and Metabolic Flux. *Science* 327, 1004-1007 (2010).
- 1067 38. Weinert, B.T. *et al.* Accurate quantification of site-specific acetylation stoichiometry  
1068 reveals the impact of sirtuin deacetylase CobB on the *E. coli* acetylome. *Molecular &  
1069 cellular proteomics : MCP* (2017).
- 1070 39. Gerber, S.A., Rush, J., Stemman, O., Kirschner, M.W. & Gygi, S.P. Absolute quantification of  
1071 proteins and phosphoproteins from cell lysates by tandem MS. *Proceedings of the National  
1072 Academy of Sciences of the United States of America* 100, 6940-6945 (2003).
- 1073 40. Weinert, B.T., Moustafa, T., Iesmantavicius, V., Zechner, R. & Choudhary, C. Analysis of  
1074 acetylation stoichiometry suggests that SIRT3 repairs nonenzymatic acetylation lesions.  
1075 *The EMBO journal* 34, 2620-2632 (2015).
- 1076 41. Qian, M.X. *et al.* Acetylation-mediated proteasomal degradation of core histones during  
1077 DNA repair and spermatogenesis. *Cell* 153, 1012-1024 (2013).
- 1078 42. Cohen, T.J. *et al.* The acetylation of tau inhibits its function and promotes pathological tau  
1079 aggregation. *Nat Commun* 2, 252 (2011).
- 1080 43. Cohen, T.J. *et al.* An acetylation switch controls TDP-43 function and aggregation  
1081 propensity. *Nat Commun* 6, 5845 (2015).
- 1082 44. Barends, T.R. *et al.* Structure and mechanism of a bacterial light-regulated cyclic nucleotide  
1083 phosphodiesterase. *Nature* 459, 1015-1018 (2009).
- 1084 45. Zhang, H.-N. *et al.* Cyclic di-GMP regulates *Mycobacterium tuberculosis* resistance to  
1085 ethionamide. *Scientific Reports* 7 (2017).



- 1086 46. Dubey, B.N. *et al.* Cyclic di-GMP mediates a histidine kinase/phosphatase switch by  
1087 noncovalent domain cross-linking. *Sci. Adv.* 2 (2016).
- 1088 47. Christen, M. *et al.* Asymmetrical distribution of the second messenger c-di-GMP upon  
1089 bacterial cell division. *Science* 328, 1295-1297 (2010).
- 1090 48. Zimmerman, S.B. & Trach, S.O. Estimation of macromolecule concentrations and excluded  
1091 volume effects for the cytoplasm of *Escherichia coli*. *J. Mol. Biol.* 222, 599-620 (1991).
- 1092 49. Parry, Bradley R. *et al.* The Bacterial Cytoplasm Has Glass-like Properties and Is Fluidized by  
1093 Metabolic Activity. *Cell* 156, 183-194 (2014).
- 1094 50. Kim, G.-W. & Yang, X.-J. Comprehensive lysine acetylomes emerging from bacteria to  
1095 humans. *Trends in Biochemical Sciences* 36, 211-218 (2011).
- 1096 51. Sasikaran, J., Ziemski, M., Zadora, P.K., Fleig, A. & Berg, I.A. Bacterial itaconate degradation  
1097 promotes pathogenicity. *Nature Chemical Biology* 10, 371-U382 (2014).
- 1098 52. Liang, W.X., Malhotra, A. & Deutscher, M.P. Acetylation Regulates the Stability of a  
1099 Bacterial Protein: Growth Stage-Dependent Modification of RNase R. *Molecular cell* 44,  
1100 160-166 (2011).
- 1101 53. Caimano, M.J., Drecktrah, D., Kung, F. & Samuels, D.S. Interaction of the Lyme disease  
1102 spirochete with its tick vector. *Cellular microbiology* 18, 919-927 (2016).
- 1103 54. Rotem, O. *et al.* An Extended Cyclic Di-GMP Network in the Predatory Bacterium  
1104 *Bdellovibrio bacteriovorus*. *Journal of bacteriology* 198, 127-137 (2016).
- 1105 55. Jonas, K. *et al.* The RNA binding protein CsrA controls cyclic di-GMP metabolism by directly  
1106 regulating the expression of GGDEF proteins. *Molecular microbiology* 70, 236-257 (2008).
- 1107 56. Zahringer, F., Lacanna, E., Jenal, U., Schirmer, T. & Boehm, A. Structure and signaling  
1108 mechanism of a zinc-sensory diguanylate cyclase. *Structure* 21, 1149-1157 (2013).
- 1109 57. Thauer, R.K., Jungermann, K. & Decker, K. Energy conservation in chemotrophic anaerobic  
1110 bacteria. *Bacteriological reviews* 41, 100-180 (1977).
- 1111 58. Dubbs, J.M. & Robert Tabita, F. Regulators of nonsulfur purple phototrophic bacteria and  
1112 the interactive control of CO<sub>2</sub> as similation, nitrogen fixation, hydrogen metabolism and  
1113 energy generation. *FEMS microbiology reviews* 28, 353-376 (2004).
- 1114 59. Schwer, B. & Verdin, E. Conserved metabolic regulatory functions of sirtuins. *Cell Metab.* 7,  
1115 104-112 (2008).
- 1116 60. Gentner, M., Allan, M.G., Zaehringer, F., Schirmer, T. & Grzesiek, S. Oligomer formation of  
1117 the bacterial second messenger c-di-GMP: reaction rates and equilibrium constants  
1118 indicate a monomeric state at physiological concentrations. *Journal of the American  
1119 Chemical Society* 134, 1019-1029 (2012).
- 1120 61. Poteete, A.R. What makes the bacteriophage lambda Red system useful for genetic  
1121 engineering: molecular mechanism and biological function. *FEMS Microbiol. Lett.* 201, 9-14  
1122 (2001).
- 1123 62. Spangler, C., Bohm, A., Jenal, U., Seifert, R. & Kaefer, V. A liquid chromatography-coupled  
1124 tandem mass spectrometry method for quantitation of cyclic di-guanosine monophosphate.  
1125 *Journal of microbiological methods* 81, 226-231 (2010).
- 1126 63. Deutsch, E.W. *et al.* The ProteomeXchange consortium in 2017: supporting the cultural  
1127 change in proteomics public data deposition. *Nucleic acids research* 45, D1100-D1106  
1128 (2017).
- 1129 64. Vizcaino, J.A. *et al.* 2016 update of the PRIDE database and its related tools. *Nucleic acids*



1130 *research 44, D447-D456 (2016).*

1131

1132

### 1133 **Acknowledgements**

1134 We thank Prof. Yufeng Yao of Shanghai Jiao Tong University for providing

1135 *S. typhimurium* CobB overexpression plasmid. We thank Prof. Yan Wei

1136 and Liyun Ji of Shanghai Jiao Tong University for performing the Q

1137 Exactive plus assay. We thank Ademi Zhakyp of Nazarbayev University

1138 for proof-reading the manuscript. This study was supported in part by

1139 The National Key Research and Development Program of China Grant

1140 2016YFA0500600, National Natural Science Foundation of China Grants

1141 31670831, 31370813, to S.C.T., 31370750, 31670722 to D.M.C., and

1142 31670066 to M.J.T., and National Basic Research Program of China (973

1143 Program) (No. 2014CBA02004) to M.J.T..

1144

### 1145 **Author Contributions Statement**

1146 S.C.T. conceived the idea. L.J.B. provided key reagents. Z.W.X. and C.X.L.

1147 performed interaction assay and functional analysis. Z.W.X. and C.X.L.

1148 performed enzyme activity assay. Z.W.X., H.N.Z., X.R.Z. and H.T.L.

1149 performed structure analysis and protein mutation. H.N.Z. and X.R.Z.

1150 performed the ITC and MST assay. Z.W.X., H.N.Z., X.R.Z., H.W.J., S.J.G and

1151 F.L.W. prepared the figures with the help of S.H.W. L.L.Q. and M.J.T.

1152 performed the SILAC-MS. F.L. performed the UPLC-IM-MS analysis. J.L.H.

1153 performed Nano LC maXis impact UHR-TOF MS analysis. Z.W.X., H.N.Z.,  
1154 X.R.Z., D.M.C. and S.C.T. wrote the manuscript.

1155

#### 1156 **Additional Information**

1157 **Competing financial interests:** The authors declare that we have no  
1158 conflict of interest.

1159

#### 1160 **Figure legends**

##### 1161 **Figure 1. Protein deacetylase CobB is a novel c-di-GMP effector. (a)**

1162 The *E.coli* proteome microarrays were probed with bio-c-di-GMP,  
1163 followed by incubation with Cy3-conjugated streptavidin. A control  
1164 experiment was carried out with biotin. Obvious binding difference of  
1165 CobB on the microarrays incubated with bio-c-di-GMP vs. biotin was  
1166 observed. There are two spots per protein, SNR (+) is the average signal  
1167 to noise ratio of the two duplicate spots. **(b)** Streptavidin blotting assay.

1168 Affinity purified CobB was incubated with 10  $\mu$ M bio-c-di-GMP. 10  $\mu$ M  
1169 biotin, biotin-cGMP and biotin-c-di-AMP were included as negative  
1170 controls. In the 3<sup>rd</sup> lane, CobB was incubated with 10  $\mu$ M bio-c-di-GMP  
1171 and 20  $\mu$ M c-di-GMP. The bindings of the biotinylated ligands were  
1172 visualized by streptavidin. Silver staining showed equal amounts of CobB  
1173 were included for each reaction. **(c)** ITC analysis of the binding between  
1174 c-di-GMP and CobB. 1.5 mM c-di-GMP (purple line) was titrated into

1175 CobB, in parallel assays, equal amount of cGMP (green line) and  
1176 c-di-AMP (red line) were included as the negative controls. The Kd of  
1177 c-di-GMP and CobB binding was determined as 21.6  $\mu$ M.

1178

1179 **Figure 2. c-di-GMP inhibits the deacetylase activity of CobB and**  
1180 **down-regulates the biogenesis of acetyl-CoA. (a)** CobB activity assay  
1181 was performed using Acs as substrate. The loss of the acetylation of Acs  
1182 indicates CobB's deacetylase activity, as shown by the pan anti-acetyl  
1183 antibody. (three preparations;  $**P < 0.01$ , two-tailed Student's t-test).  
1184 The protein levels of Acs and CobB were determined by silver staining. **(b)**  
1185 The kinetics of CobB enzyme-catalyzed reactions. The CobB catalytic  
1186 kinetics were performed with the addition of 0, 10, 20, 80  $\mu$ M c-di-GMP  
1187 and an acetylated peptide was used as the substrate. The acetylated and  
1188 deacetylated peptides were quantified by HPLC with three replicates and  
1189 these curves were fitting by michaelis-menten equation using GraphPad  
1190 Prism 6. **(c)** The endogenous c-di-GMP levels of the 6 *E.coli* strains were  
1191 determined by UPLC-IM-MS (three preparations;  $*P < 0.05$ , two-tailed  
1192 Student's t-test). **(d)** CobB's deacetylation activity was monitored using  
1193 endogenous Acs as substrate for the 6 strains. 3xFLAG-tagged Acs was  
1194 enriched by an anti-FLAG antibody and the acetylation level was  
1195 determined by the pan anti-acetyl antibody. The expression of DGC and  
1196 CobB were determined using an anti-His antibody. The bar graph showed

1197 the quantitation of the acetylation level of Acs. (three preparations; \* $P <$   
1198 0.05 and \*\* $P <$  0.01, two-tailed Student's t-test) **(e)** c-di-GMP modulates  
1199 the synthesis of acetyl-CoA through inhibiting CobB to deacetylate Acs. **(f)**  
1200 The growth curves of the 6 strains were determined. The *E.coli* strains  
1201 were cultured in Vogel-Bonner medium. The growth was measured at 8,  
1202 12, 16, 20, 24 and 32 h with three replicates.

1203

1204 **Figure 3. c-di-GMP globally affects CobB-dependent deacetylation.**

1205 c-di-GMP affects *E.coli* acetylation. Two strains, *i.e.*, WT and *ydeH*<sup>+</sup> were  
1206 included for quantitative acetylation analysis using SILAC-MS. **(a)** The  
1207 mass spectra show light (*ydeH*<sup>+</sup>) and heavy (WT) signal for a  
1208 representative peptide. **(b)** Histogram shows the SILAC ratio distribution  
1209 of acetylation sites in *ydeH*<sup>+</sup> cells compared to that of the WT cells.  
1210 The levels of 107 acetylated peptides were upregulated in *ydeH*<sup>+</sup>. **(c)** The  
1211 pie charts show the overlap of the c-di-GMP regulated acetylation sites  
1212 and the known CobB regulated acetylation sites reported by Weinert *et*  
1213 *al.* **(d)** The charts show the overlap of c-di-GMP regulated acetylation  
1214 proteins and the known CobB regulated acetylation proteins reported by  
1215 Weinert *et al.*

1216

1217 **Figure 4. Determination of the binding sites of c-di-GMP on CobB. (a)**

1218 CobB domain architecture shows the N-terminal domain (colored yellow).

1219 While for the truncation version of CobB, *i.e.*, CobB<sub>5</sub>, there is no  
1220 N-terminal domain. **(b)** CobB<sub>5</sub> lost the binding with c-di-GMP. Both CobB  
1221 and CobB<sub>5</sub> were incubated with bio-c-di-GMP. After UV cross linking, the  
1222 reactions were subjected for streptavidin blotting. **(c)** Streptavidin  
1223 blotting assays for WT and CobB mutants. It is known that c-di-GMP  
1224 tends to bind residues Arg (R) and Glu (E). We individually mutated all  
1225 the R and E residues to pinpoint the binding sites. The c-di-GMP binding  
1226 assays were carried out with all these mutated CobB, the bindings were  
1227 visualized by streptavidin. The loadings were monitored by Ponceau S  
1228 staining. **(d)** ITC assay to measure the binding kinetics of c-di-GMP and  
1229 three CobB mutants. **(e)** *In vitro* deacetylation assay of the three CobB  
1230 mutants using Acs as substrate with three replicates. **(f)** The  
1231 deacetylation activity of CobB mutants were monitored using  
1232 endogenous Acs as substrate *in vivo*. (three preparations; two-tailed  
1233 Student's t-test, \**P* < 0.05) **(g)** The growth curves of the CobB mutated  
1234 strains were determined. The growth was measured at 8, 12, 16, 20, 24  
1235 and 32 h with three replicates.

1236

1237 **Figure 5. c-di-GMP binds CobB and inhibits its activity is conserved in**  
1238 **prokaryotes. (a)** CLUSTALW alignment of the binding motif of c-di-GMP  
1239 and CobB. Residues involved in c-di-GMP binding R8, R17 and E21 were  
1240 boxed (Gray) and the depth of color indicated the degree of conservative

1241 of the residues. **(b)** c-di-GMP binding assay of *E.coli* and *S. typhimurium*  
1242 CobB. The *E.coli* and *S. typhimurium* CobB were incubated with  
1243 bio-c-di-GMP, same amount of biotin, cGMP and c-di-AMP were included  
1244 as controls. **(c)** c-di-GMP inhibits *S. typhimurium* CobB's deacetylase  
1245 activity *in vitro*. CobB<sup>*S. typhimurium*</sup> activity assay was performed using *E.coli*  
1246 Acs as the substrate. The acetylation level of Acs was detected by the  
1247 pan anti-acetyl antibody. (three preparations; \**P* < 0.05, two-tailed  
1248 Student's t-test).

1249

1250 **Figure 6. CobB up-regulates the level of c-di-GMP through**  
1251 **deacetylation of the major diguanylate cyclase YdeH in *E.coli*.** **(a)** The  
1252 acetylation levels of four c-di-GMP related enzymes of *E. coli* with or  
1253 without CobB treatment was monitored by the pan anti-acetyl antibody.  
1254 **(b)** Mass spectrometry (MS) analysis to determine the acetylation site/s  
1255 of YdeH that could be deacetylated by CobB. The affinity purified YdeH  
1256 with or without CobB treatment were subjected for MS analysis. K4 was  
1257 discovered as the deacetylation site. **(c)** Mutagenesis of YdeH confirmed  
1258 that K4 is the major acetylation site. All the 8 Lys residues of YdeH were  
1259 mutated to Ala individually. The acetylation was visualized using the  
1260 anti-acetyl antibody. **(d)** Mutagenesis of YdeH K4 confirms the  
1261 acetylation of K4. Three single YdeH mutants, K4R, K4Q and K4A were  
1262 constructed. **(e)** CobB modulates the synthesis of c-di-GMP through

1263 deacetylating YdeH. **(f)** The DGC activity of the three mutants along with  
1264 WT YdeH and CobB treated WT YdeH were analyzed using UPLC-IM-MS *in*  
1265 *vitro* with three replicates, the peak areas represent the amounts of  
1266 c-di-GMP in these samples. **(g)** YdeH's acetylation levels and c-di-GMP  
1267 concentrations were measured with CobB mutants and YdeH mutants.  
1268 The acetylation level of purified YdeH was detected by the pan  
1269 anti-acetyl antibody and the protein levels of YdeH and CobB were  
1270 determined by the anti-His antibody. (three preparations; \* $P < 0.05$ , \*\* $P$   
1271  $< 0.01$ , two-tailed Student's t-test).

1272

1273 **Figure 7. YdeH is endogenous acetylated and this acetylation is**  
1274 **regulated by CobB. (a)** The endogenous YdeH acetylation level of 3 *E.coli*  
1275 strains. A 3xFLAG tag was chromosomally inserted at the 3'-end of Acs  
1276 coding sequence. 3xFLAG-tagged YdeH was enriched by an anti-FLAG  
1277 antibody and the acetylation levels were determined by the pan-Ack  
1278 antibody. **(b)** The mass spectra show AQUA quantification of the  
1279 endogenous acetylation of YdeH K4 using AQUA peptides. **(c)** The level of  
1280 the endogenous YdeH. The protein levels were determined by the  
1281 anti-FLAG antibody and GroEL was applied as the loading control. The  
1282 bar graph showed the quantitation of the protein levels of YdeH with  
1283 three replicates. **(d)** The relative mRNA repression of endogenous YdeH.  
1284 **(e)** The stability of YdeH with or without CobB treatment. These samples

1285 were separated at 0.5 h, 1.5h and 2.5 h and the protein levels were  
1286 determined by the anti-His antibody. The bar graph showed the  
1287 quantitation of the protein level of YdeH with three replicates. **(f)** The  
1288 level of the overexpressed YdeH in the supernatant and sediment. The  
1289 protein levels were determined by the anti-His antibody and GroEL was  
1290 applied as the loading control. The bar graph showed the quantitation of  
1291 the protein level of supernatant YdeH with three replicates.

1292

1293 **Figure 8. The regulating model of c-di-GMP and CobB interplay. (a)**

1294 YdeH K4 acetylation reduce YdeH's stability and cause precipitation. **(b)**

1295 The overview of c-di-GMP and CobB interplay. c-di-GMP inhibits the  
1296 deacetylation activity of CobB and then regulates Ac-CoA synthesis. In  
1297 another direction, CobB activates YdeH's DGC activity through  
1298 deacetylation to prevent the precipitation of YdeH, and also activate  
1299 YdeH. In addition, Ac-CoA modulates GTP, the precursor of c-di-GMP  
1300 generation through TCA. Quantitatively, c-di-GMP abolishes 72% of CobB's  
1301 decetylation activity through direct binding of CobB, and CobB promotes  
1302 c-di-GMP level to 36% more through deacetylation of YdeH.



a.

| Protein | Bio-c-di-GMP                                                                      | Biotin                                                                            | SNR(+) |
|---------|-----------------------------------------------------------------------------------|-----------------------------------------------------------------------------------|--------|
| CobB    |  |  | 2.16   |

b.

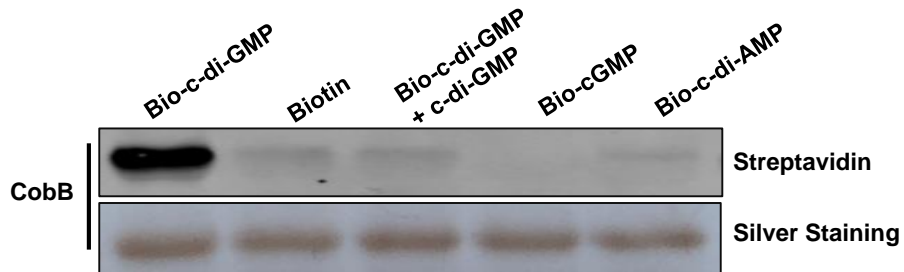

c.

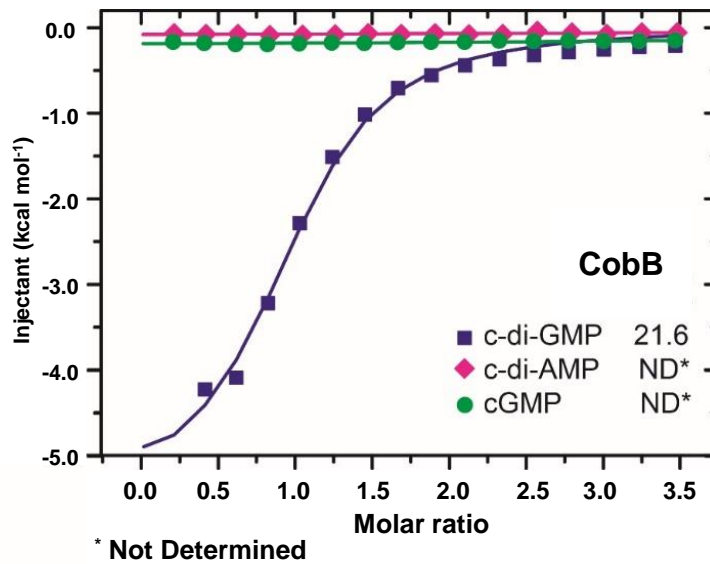

Xu *et al.* Figure 1.

a.

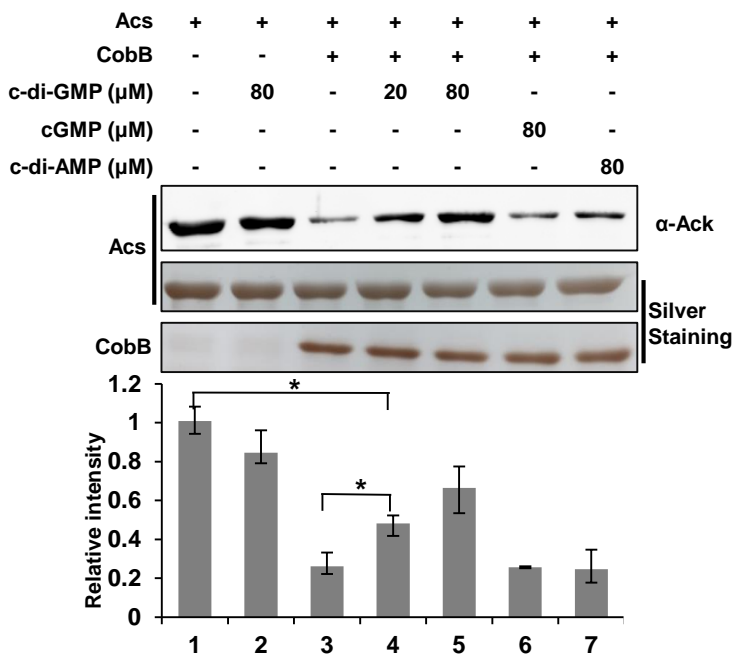

b.

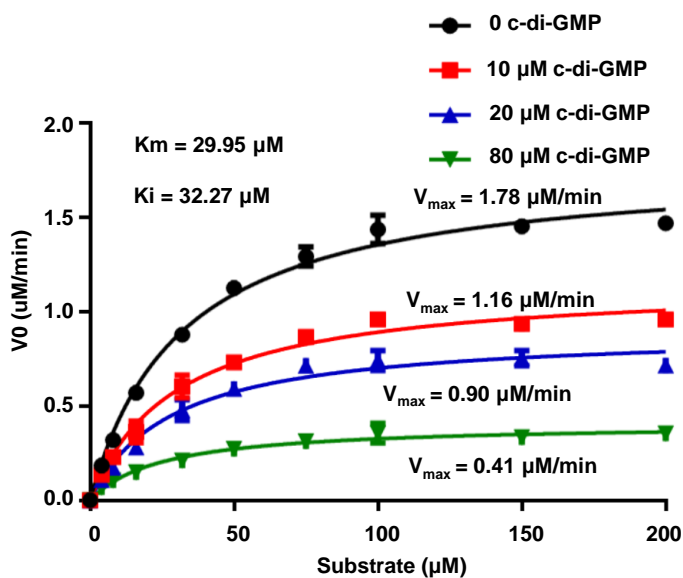

c.

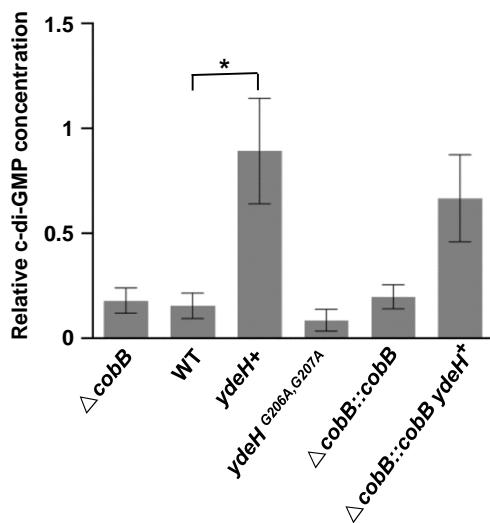

d.

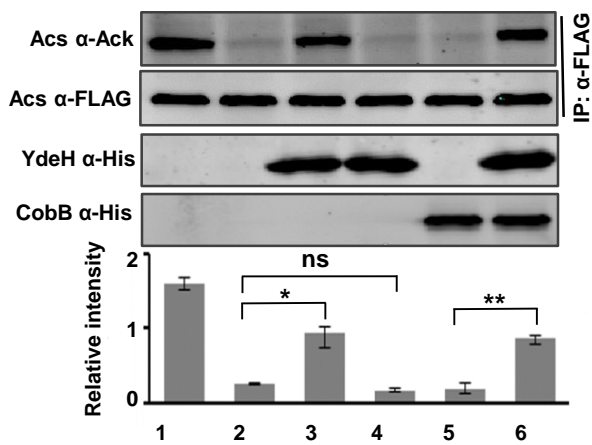

e.

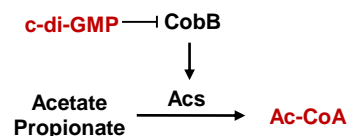

f.

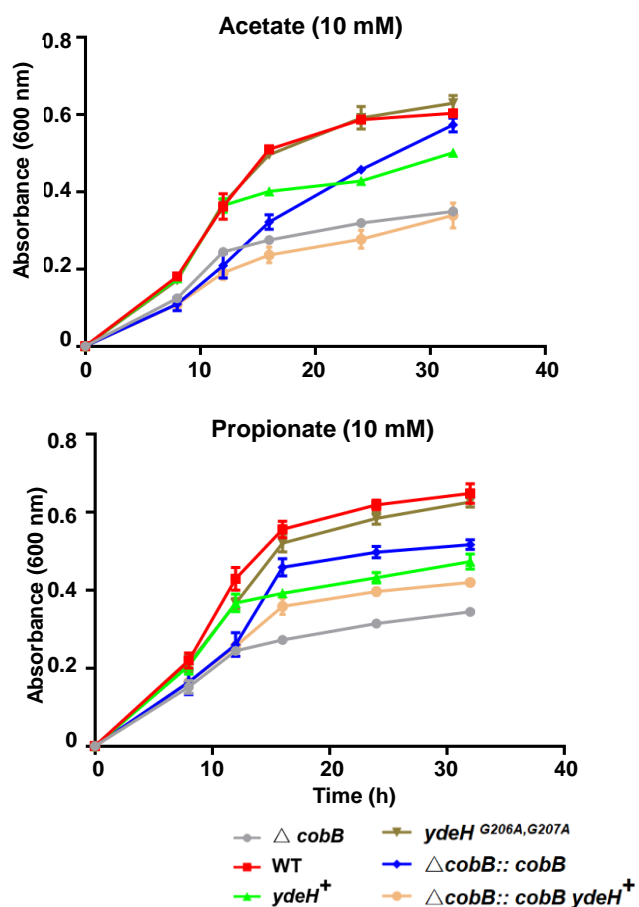

Xu et al. Figure 2.

a.

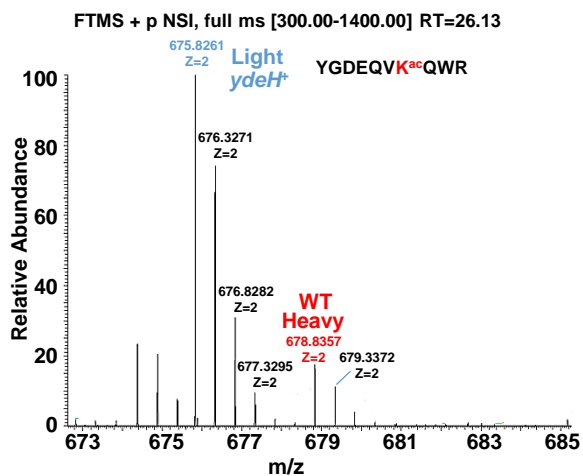

b.

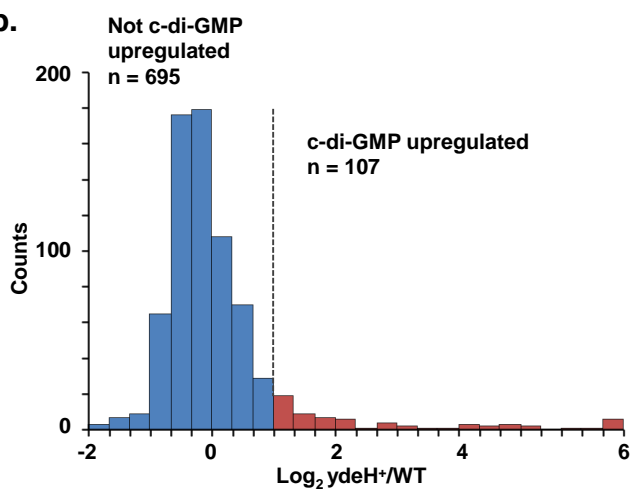

c.

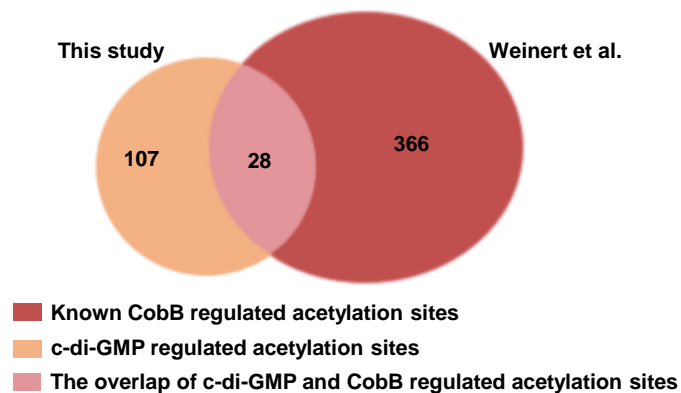

d.

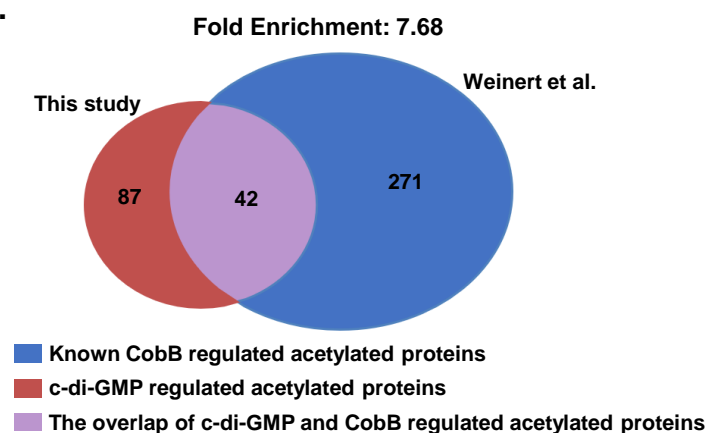

**Xu et al. Figure 3.**

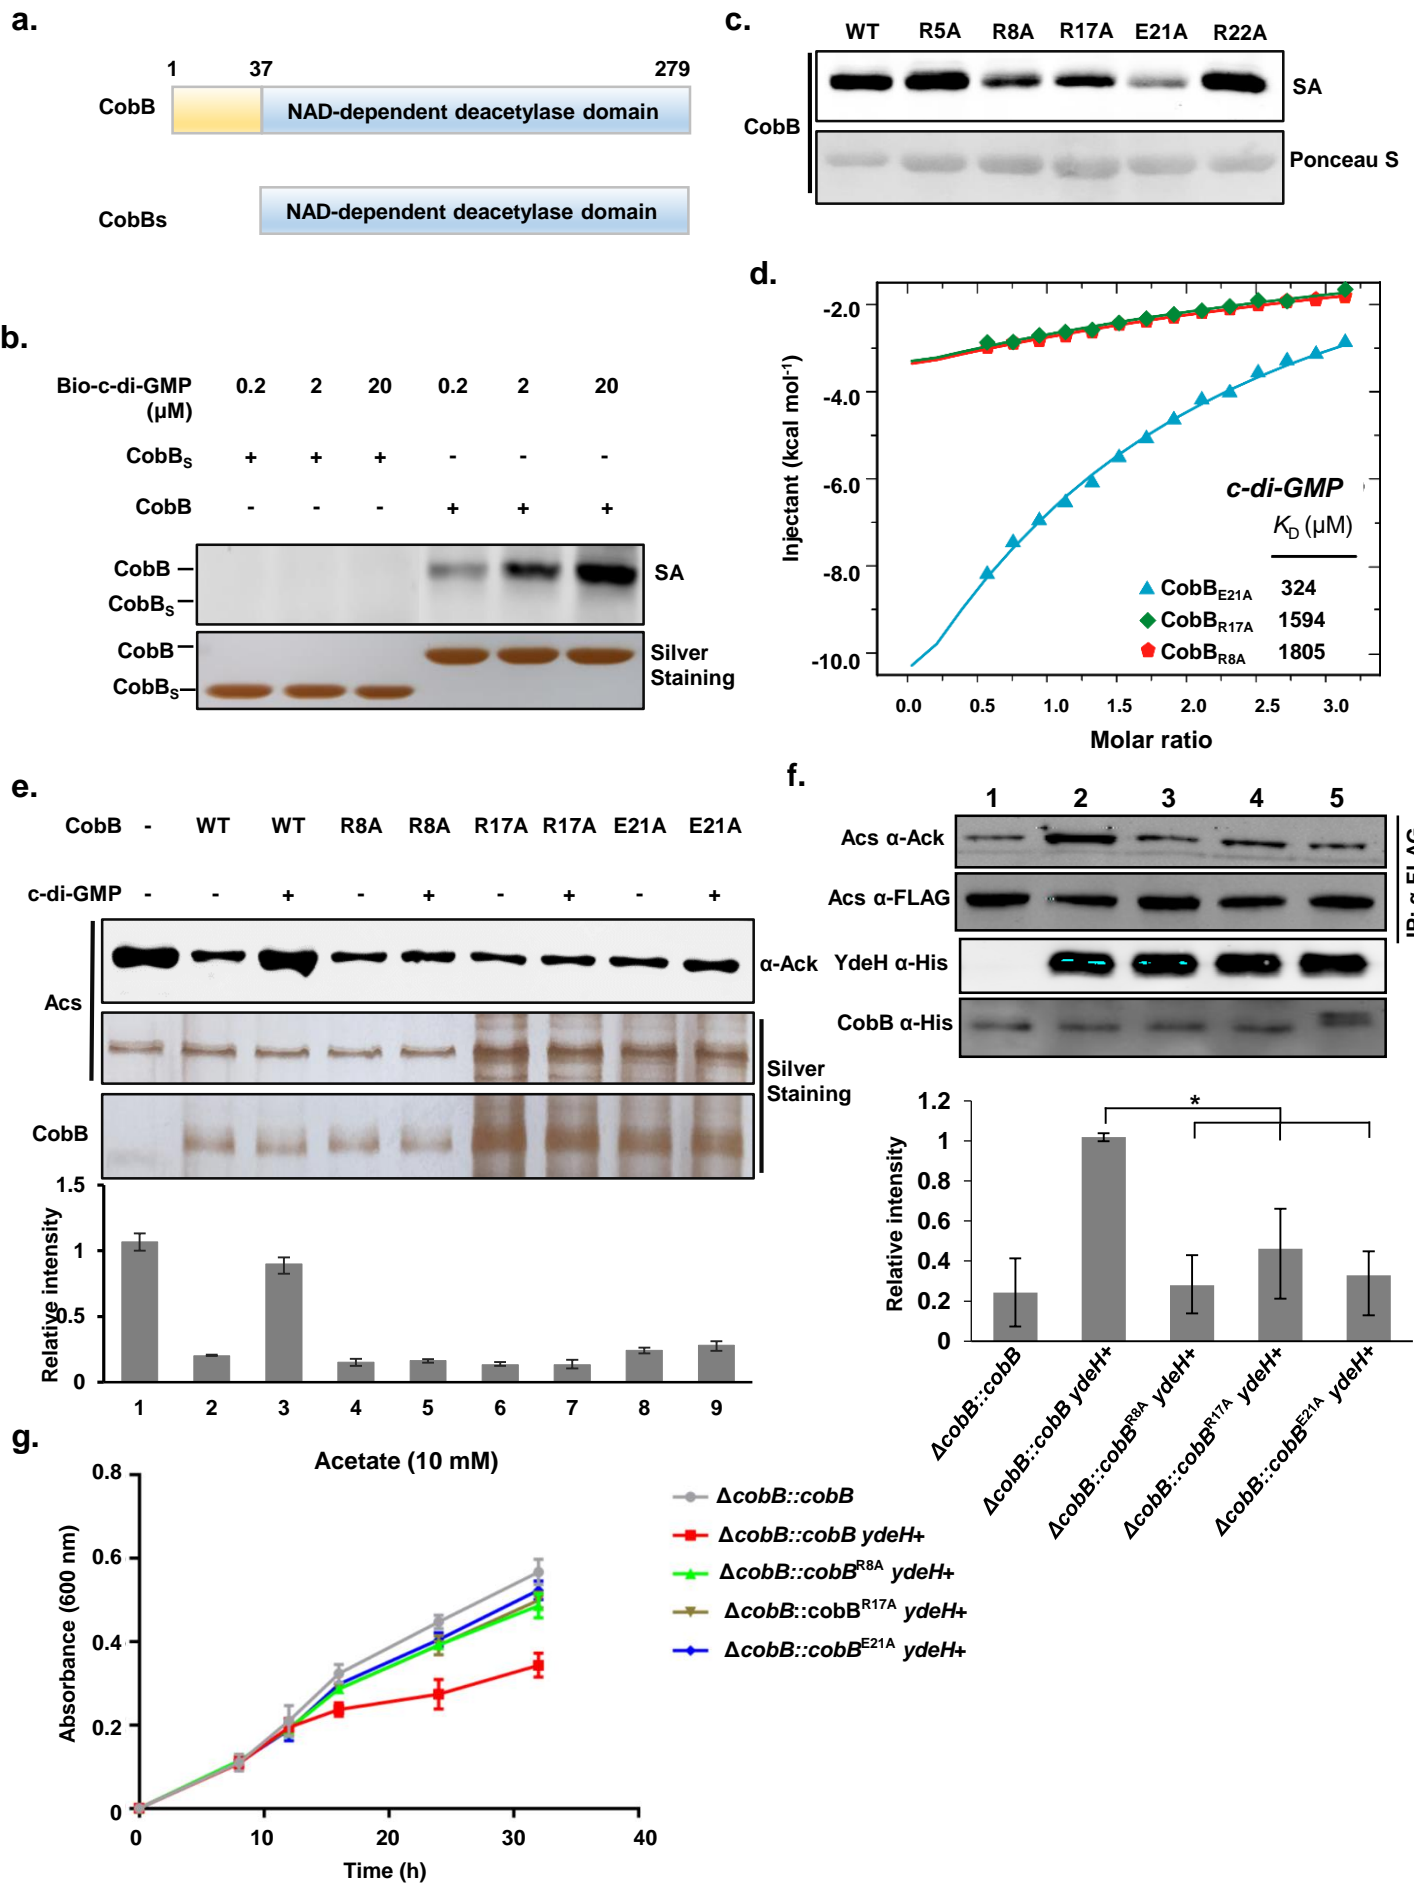

Xu *et al.* Figure 4.

**a.**

|                                    | R8                  | R17                | E21 |
|------------------------------------|---------------------|--------------------|-----|
| <i>Escherichia coli</i>            | ML.SRRGHRLSRFRK     | NRRLRERLRQRIFFRDK  |     |
| <i>Salmonella typhimurium</i>      | MQ.SRRFHLRSLRFRK    | NRLRERLRQRIFFRDR   |     |
| <i>Yersinia pestis</i>             | . . .MRIRHRLCRFRKSK | VRHQFRFSRIFHRDS    |     |
| <i>Shigella dysenteriae</i>        | ML.SRRGHRLSRFRK     | NRRLRERLRQRIFFRDK  |     |
| <i>Citrobacter amalonaticus</i>    | ML.SRRGHRLSRFRK     | NRLRERLRQRIFFRDR   |     |
| <i>Erwinia tracheiphila</i>        | MRNPRRRLRLARYKKN    | RQVHQFRFRQIFERDR   |     |
| <i>Vibrio parahaemolyticus</i>     | ML.SRRGHRLSRFRK     | NRLRERLRQRIFFRDR   |     |
| <i>Klebsiella oxytoca</i>          | ML.SRRGHRLSRFRK     | NRRLRERLRQRIFFRDK  |     |
| <i>Cedecea neteri</i>              | ML.SRRQHLRSLRFRK    | NRLRQRLRQRIFFRDR   |     |
| <i>Achromobacter sp. ATCC35328</i> | ML.SRRGHRLSRFRK     | NRRLRERLRQRIFFRDK  |     |
| <i>Siccibacter colletis</i>        | MQ.SRRSHRLIRFKKN    | NRRLRDLRQRIFFRDT   |     |
| <i>Lelliottia amnigena</i>         | ML.SRRQGLRSLRFRK    | NRRLRERLRQRIFFRDR  |     |
| <i>Kluyvera ascorbata</i>          | MQ.SRRLHLRSLRFRRN   | KRQLRQRLRQRIFFTDR  |     |
| <i>Cronobacter dublinensis</i>     | MQ.SRRLHLRGRFRKN    | NRRLRERLRQRIFFRDR  |     |
| <i>Chania multitudinisentens</i>   | . . .MHTRHRLCRFRKN  | KVLRHQFRFSRIFHRDT  |     |
| <i>Yokenella regensburgei</i>      | MQ.SRRLHLRTRFRLN    | KRRLRDLRQRIFFRDS   |     |
| <i>Pantoea dispersa</i>            | MRQPRRRLRLARYKKN    | RKVHQFRFRQIFERDR   |     |
| <i>Shimwellia blattae</i>          | MP.SRGLHLRCLFRFK    | NKRLRARLRQRITFFRDE |     |
| <i>Kosakonia radicincitans</i>     | MQ.SRRLHLRSLRFRRN   | KRQRERLRQRIFFRDR   |     |

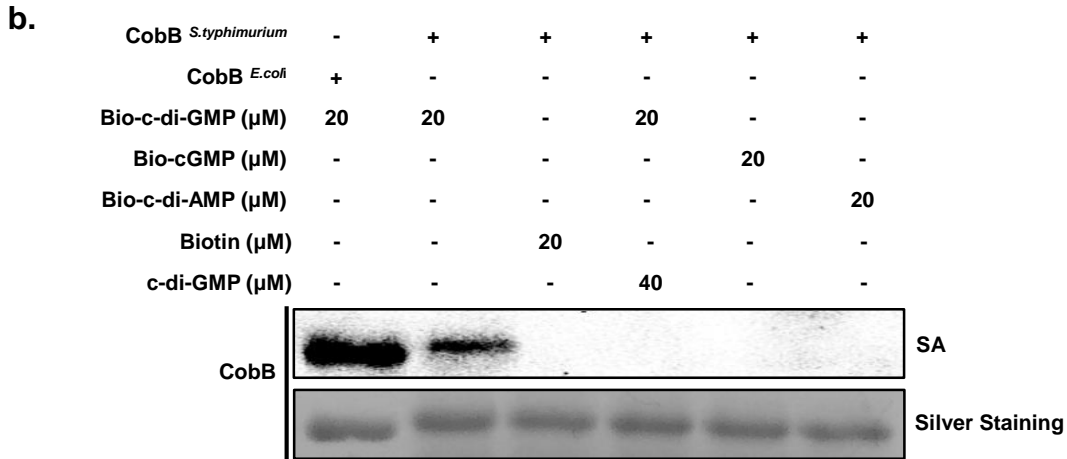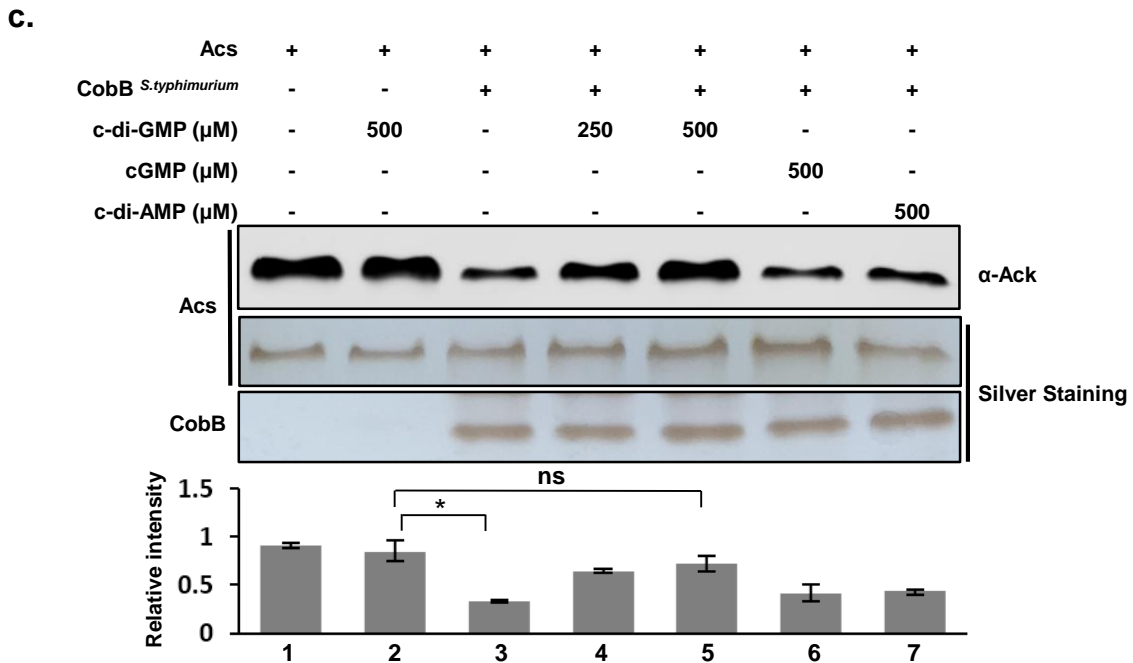

a.

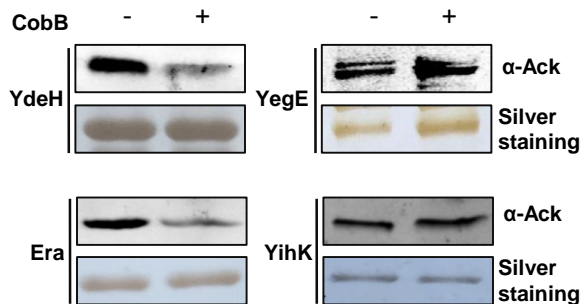

b.

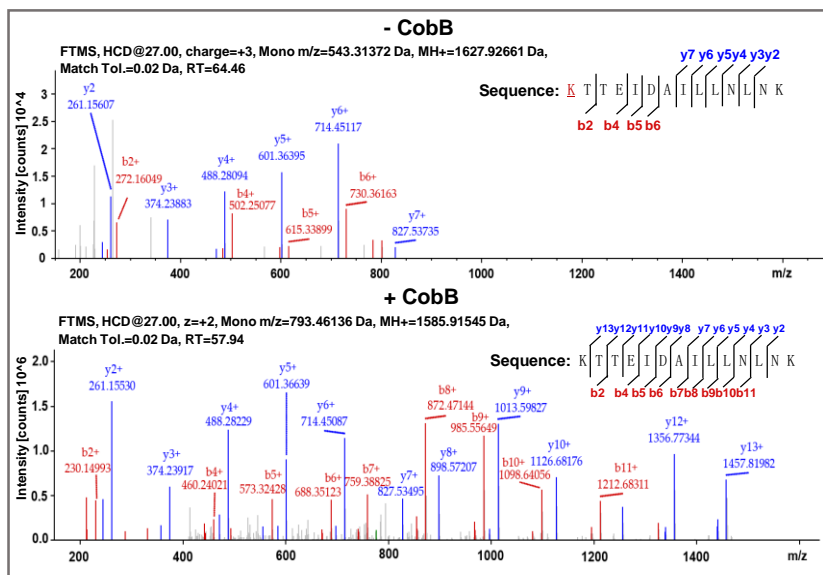

d.

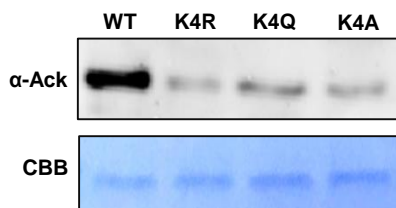

c.

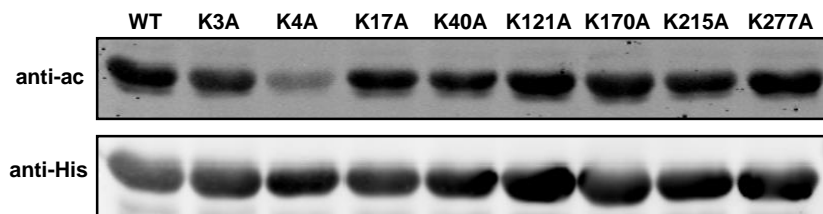

e.

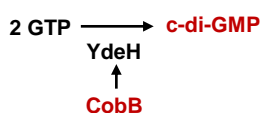

f.

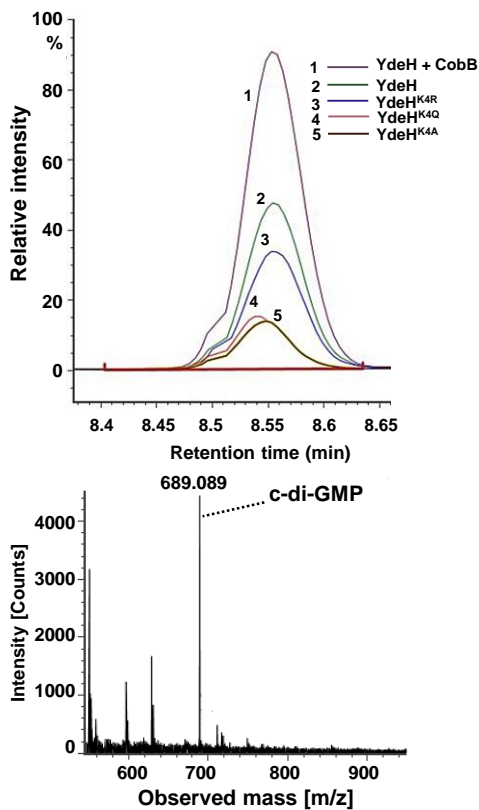

g.

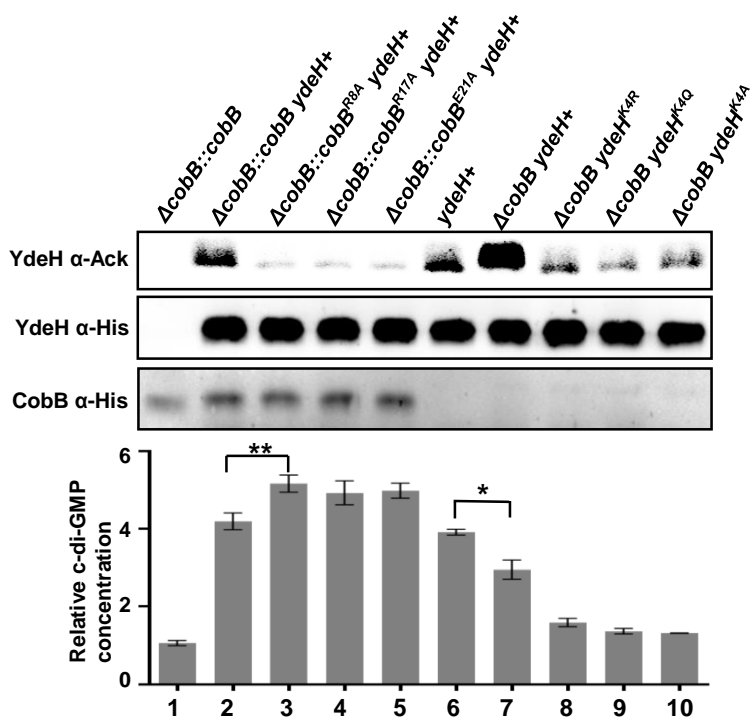

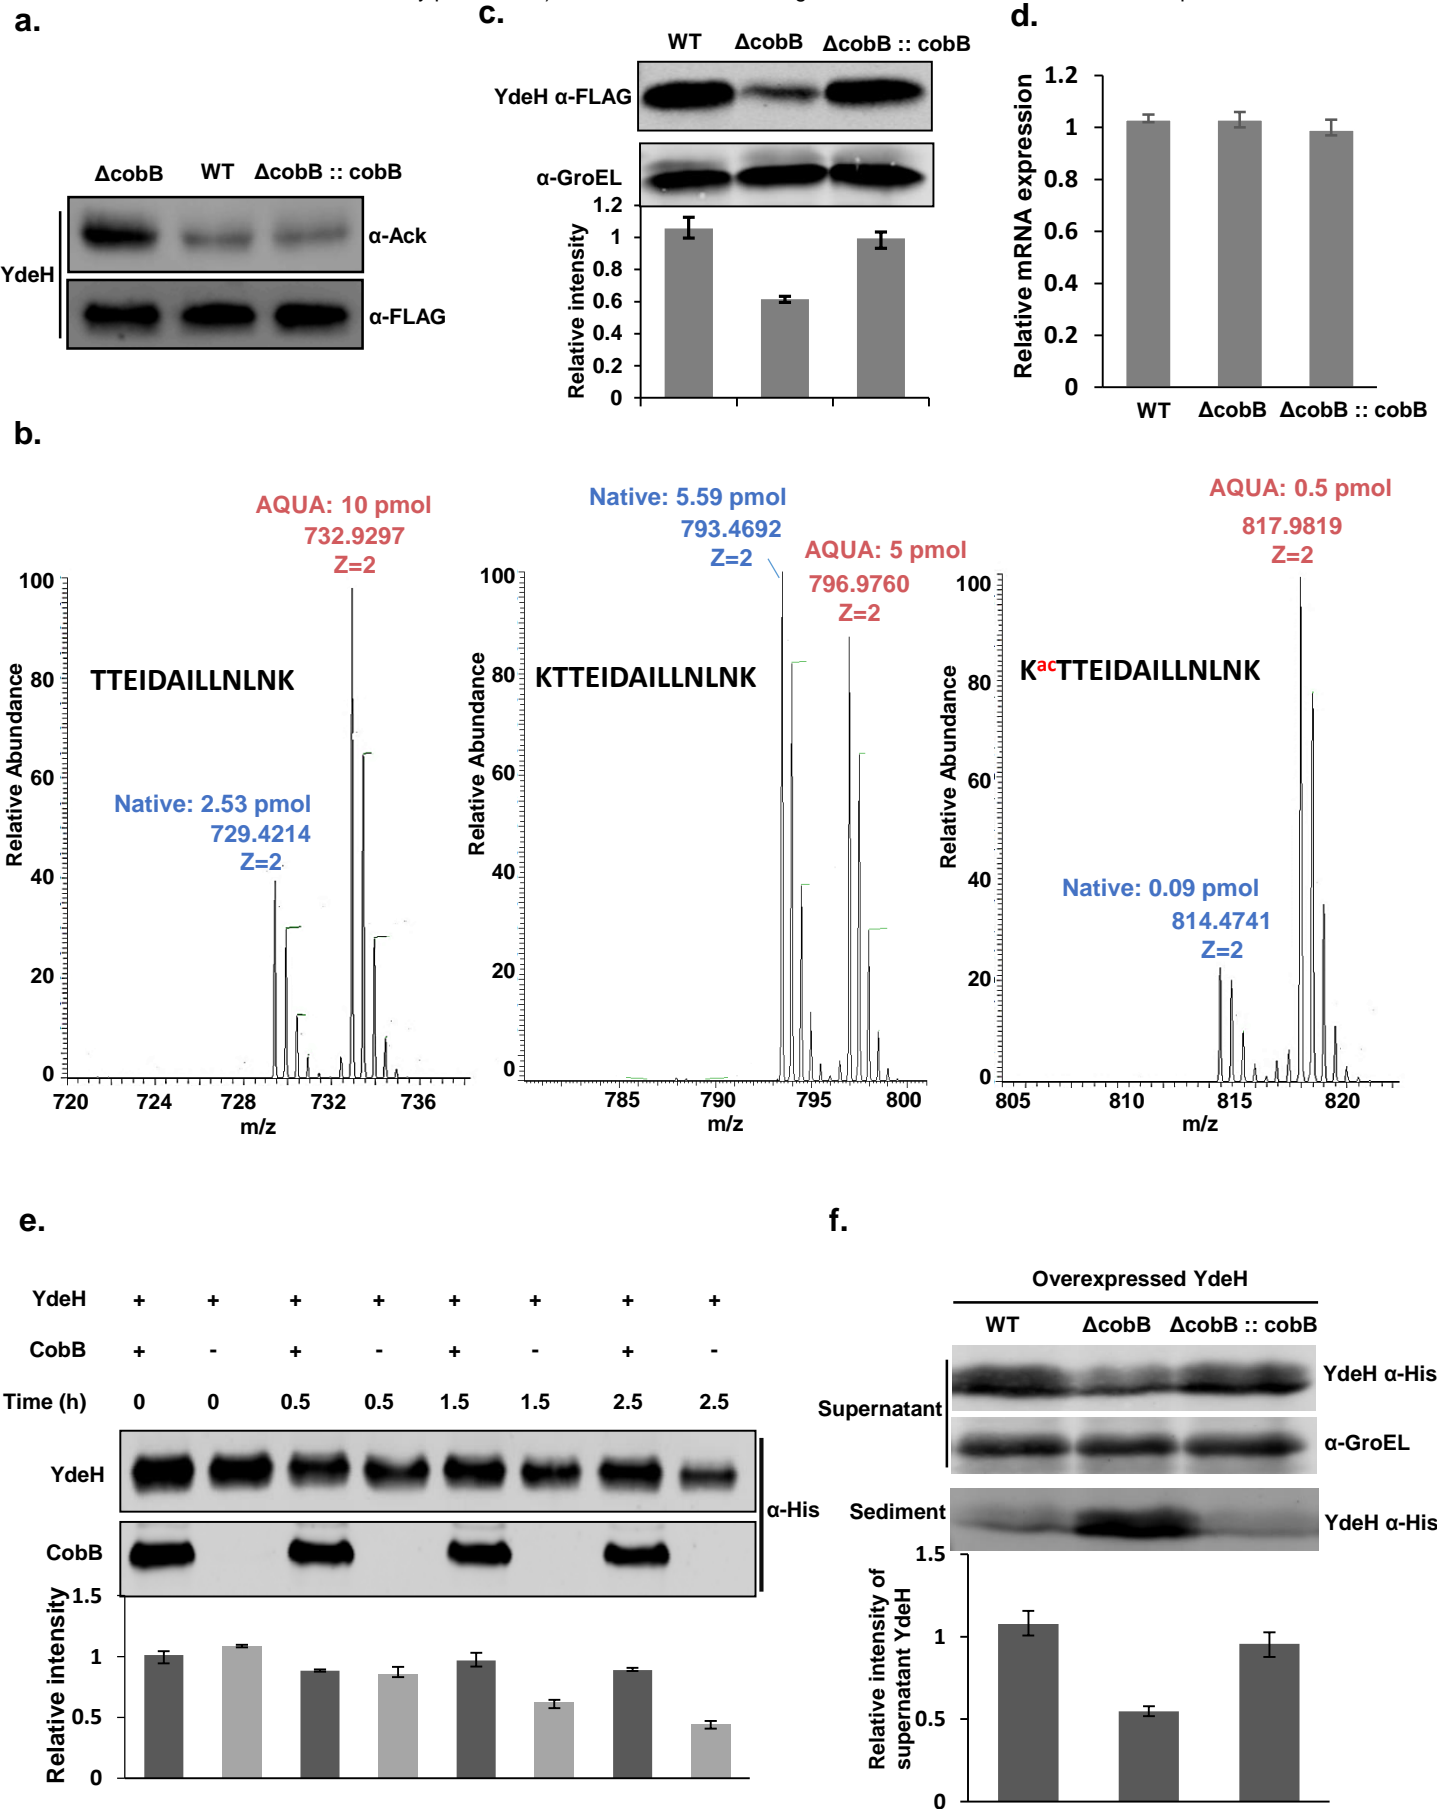

Xu *et al.* Figure 7.

a.

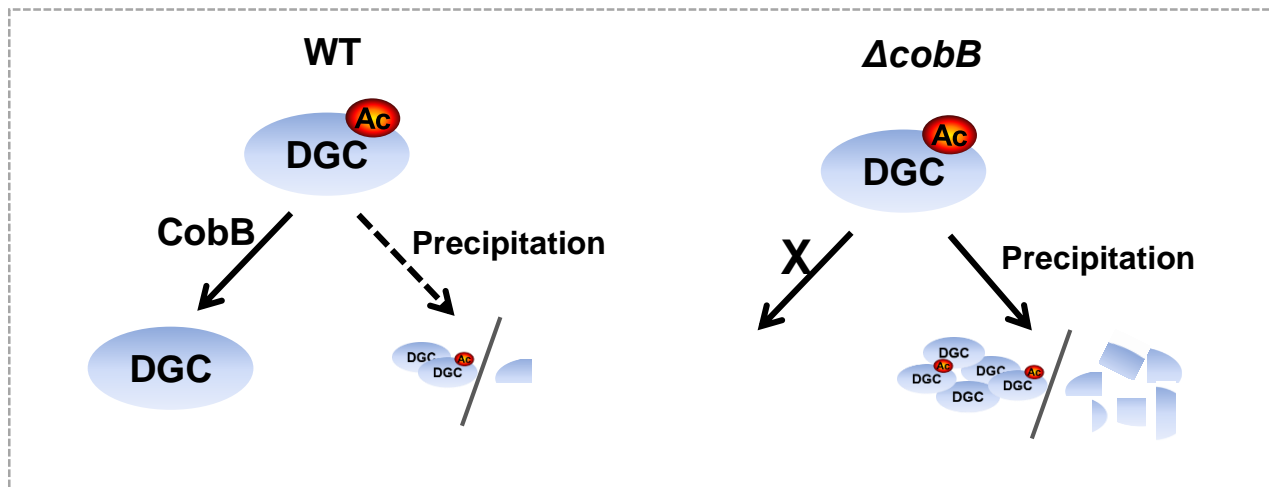

b.

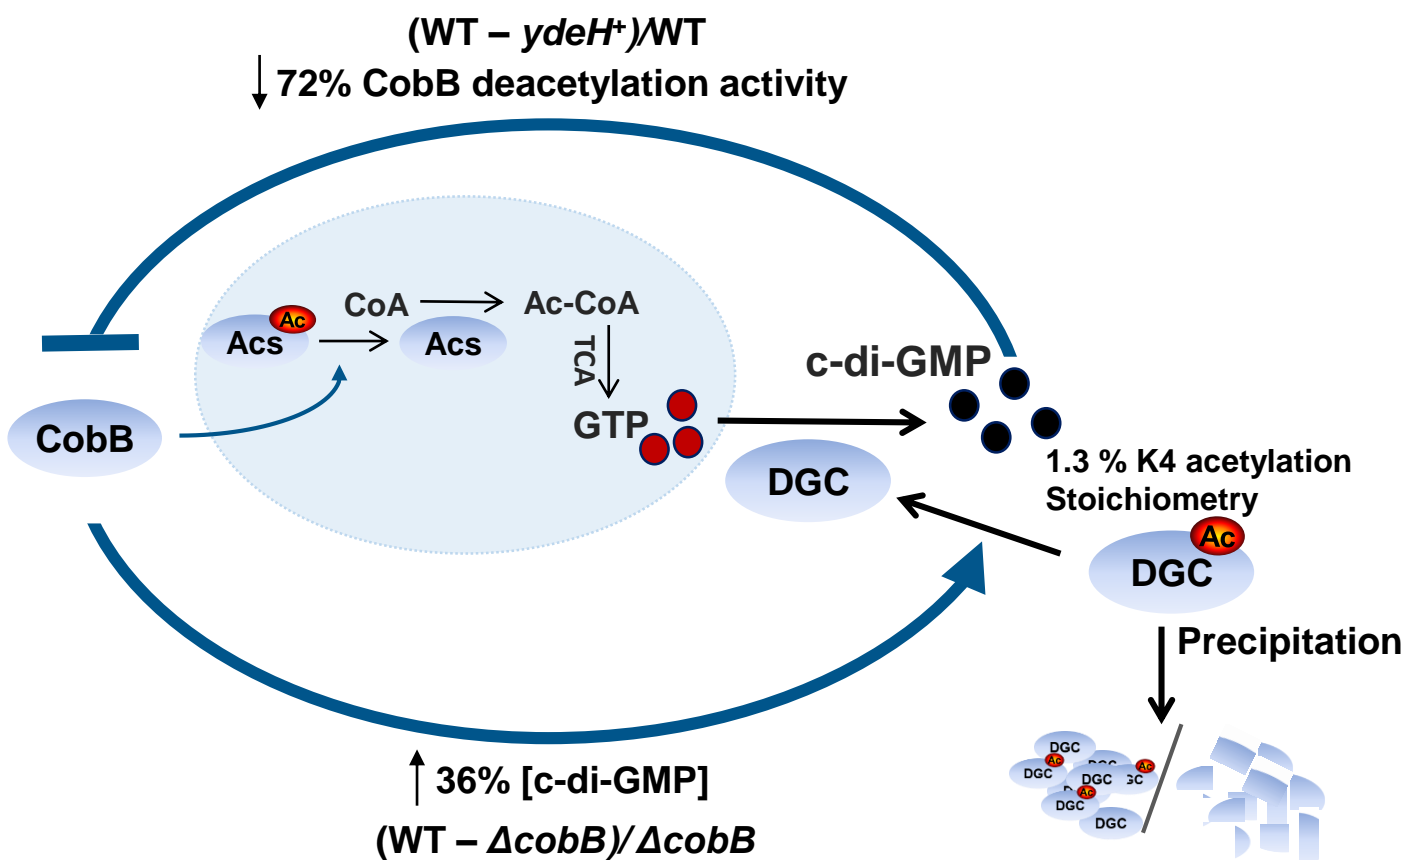

Xu *et al.* Figure 8.
